# Supplementary material
Source: Royal Society of Chemistry journal article supplement (doi:10.1039/d6gc01508e)
Supplement: d6gc01508e1.pdf [file d6gc01508e1.pdf]

## **Electronic Supplementary Information**

### **Clicking the sustainability: Nobel-awarded copper catalysed azide-alkyne cycloadditions (CuAAC) through Life Cycle Assessments analysis**

Filippo Campana,<sup>a</sup> Daniela Lanari,<sup>\*b</sup> and Luigi Vaccaro<sup>\*a</sup>

<sup>a</sup>Laboratory of Green S.O.C., Dipartimento di Chimica, Biologia e Biotecnologie, Università degli Studi di Perugia, Via Elce di Sotto 8, 06123, Perugia. Italy.

<sup>b</sup>Dipartimento di Scienze Farmaceutiche, Università degli Studi di Perugia, Via del Liceo 1, 06123 Perugia, Italy.

## 1. Methodology

### 1.1 Goal and scope definition

The main aim of the present LCA study is to evaluate the environmental and human health profile related to a series of synthetic procedures adopted for the preparation of triazoles, through copper-catalyzed azide-alkyne cycloaddition (CuAAC), to disclose which are the components or the procedures that mostly hamper their sustainability. Experimental procedures for the synthesis of the benchmark triazole 1-benzyl-4-phenyl-1,2,3-triazole were extracted from the literature. The five most notable examples in terms of excellent yields, selectivity, and variety of catalysts and conditions were chosen to evaluate their impact through an LCA study.<sup>1-5</sup>

The system boundary was defined using a cradle-to-gate approach, and the functional unit was set to 1 g of the target product. Resource exploitation and emissions to water, air, and soil were shaped by both the extraction and manufacturing of all materials, thereby framing the environmental profile and subsequent human health impacts for each chemical route analyzed.<sup>6,7</sup>

It was assumed that all processes were conducted at a single site.

Environmental impacts from raw material transportation were accounted for, based on transport distances of 100 km by lorry (>16 t) and 600 km by train. Additionally, the impacts associated with chemical plant infrastructure, including manufacturing facilities and equipment, were incorporated ( $4.00 \times 10^{-13}$  unit).

### 1.2 Inventory analysis

While setting up the LCA analysis, adopting a retrosynthetic strategy, new inventories for several chemicals have been prepared to be utilized in the evaluation. When an existing inventory dataset was available in the literature, it was considered, adjusted according to the provided assumptions, and used for constructing other inventories. General assumptions were made regarding process energy (0.0002 MJ per gram of the compound) and electricity consumption (0.000333 kWh per gram of the compound) for all unavailable compounds that required specific modeling. Given the European Union's statements that the production and use of energy account for over 75% of greenhouse gas emissions across Europe,<sup>8</sup> the contribution of electricity in the final synthetic steps affording the desired molecule has been intentionally omitted, as it is nearly identical across all the procedures studied. This exclusion from the system boundary has been further motivated by different factors. First, because the reaction is carried out at temperatures close to room temperature, the energy demand associated with stirring can be considered negligible. In addition, DFT calculations reported by Himo and colleagues<sup>3</sup> demonstrated that the azide-alkyne cycloaddition is a highly exothermic reaction, releasing approximately 60.8 kcal/mol. Under these conditions, the intrinsic chemical

energy of the reactants represents the main driving force of the process, while external energy inputs play only a marginal role compared with the need to control the spontaneous heat release for safety purposes. Accordingly, the present analysis, primarily focused on atomic efficiency, emphasizes the impact of the chemicals involved, with particular attention to the environmental and human health implications associated with the selection of catalysts, reducing agents, and, most importantly, solvents, whose significant contribution to the environmental footprint of chemical processes is widely recognized. Particularly, the emissions considered, consistent with LCA studies of chemical processes and representing the primary contributors to the associated impacts, were calculated and assumed as follows:<sup>9-11</sup>

- 0.20% of volatile input materials were considered to be emitted in the atmosphere as a consequence of the procedural operations;
- 24.50% of the wastewater treatment was presumed to be oxidized and released into the air as CO<sub>2</sub> (in the case of organic materials);
- 65.80% of the organic compounds were retained in the sludge;
- 9.70% was modeled to be discharged into rivers;
- No emissions to the soil were determined, as no agricultural destination for the digested sludge was considered.

Assumptions regarding data gaps and proxies, have been clearly outlined in the corresponding inventory tables. Specifically, the inventory for Polarclean® (*vide infra*) was not newly developed, as an existing one from the literature was used. Finally, to evaluate the absolute impact of the chemical synthesis, the yields of all procedures were standardized to 95%.

### **1.3 Impact assessment**

The impact assessment was performed using SimaPro 9.6 software and the ReCiPe 2016 method, considering 18 impact categories (*Global warming, Stratospheric ozone depletion, Ionizing radiation, Ozone formation, Human health, Fine particulate matter formation, Ozone formation, Terrestrial ecosystems, Terrestrial acidification, Freshwater eutrophication, Marine eutrophication, Terrestrial ecotoxicity, Freshwater ecotoxicity, Marine ecotoxicity, Human carcinogenic toxicity, Human non-carcinogenic toxicity, Land use, Mineral resource scarcity, Fossil resource scarcity, Water consumption*).<sup>12</sup>

Midpoint impact categories and Endpoint damage areas (*Human health, Ecosystems, and Resources*) were analyzed hierarchically over a 100-year period. Long-term emissions, which

affect scenarios beyond 100 years, were excluded. The results from the various protocols examined are presented and analyzed in Midpoints, with outcomes weighted and normalized in Endpoint damage areas. This enables a comparison of our approach with others using a single indicator as a benchmark for global environmental impact. During this process, Midpoint characterization results are transformed into intermediate units, which are then weighted and normalized to represent the relative impact in millipoints (mPts), reflecting their severity within a global context.

## 2. LCA Inventory dataset

### 2.1 Inventories for the reference processes

**Table SI-1.** Inventory for the Chan et al. procedure<sup>1</sup>

| Materials flow                | Quantity (g)<br>for 1 g of<br>product | Process air<br>emissions<br>(g) | Wastewater treatment emissions (g) |                       |                                 |
|-------------------------------|---------------------------------------|---------------------------------|------------------------------------|-----------------------|---------------------------------|
|                               |                                       |                                 | CO <sub>2</sub> to air             | Compounds<br>to river | Final waste<br>flow<br>(sludge) |
| Phenyl acetylene              | 0.456                                 | 0.0009                          | 0.0056                             | 0.0022                | 0.0150                          |
| Benzyl azide                  | 0.595                                 | 0.0012                          | 0.0073                             | 0.0029                | 0.0196                          |
| Sodium ascorbate              | 0.035                                 |                                 | 0.009                              | 0.0030                | 0.0230                          |
| Copper sulfate                | 0.011                                 |                                 |                                    | 0.0055                | 0.0055                          |
| Ligand                        | 0.084                                 |                                 | 0.0210                             | 0.0080                | 0.0550                          |
| tBuOH <sup>a</sup>            | 9.289                                 | 0.0185                          | 2.276                              | 0.9010                | 6.1120                          |
| H <sub>2</sub> O <sup>a</sup> | 5.947                                 | 0.0118                          |                                    | 5.9350                |                                 |
| Chemical factory              | 4xE-13 p                              |                                 |                                    |                       |                                 |

<sup>a</sup>tBuOH:H<sub>2</sub>O 2:1. 0.25M; Isobutanol used instead of tBuOH

**Table SI-2.** Inventory for the Rostovtsev et al. procedure<sup>2</sup>

| Materials flow                | Quantity (g)<br>for 1 g of<br>product | Process air<br>emissions<br>(g) | Wastewater treatment emissions (g) |                       |                                 |
|-------------------------------|---------------------------------------|---------------------------------|------------------------------------|-----------------------|---------------------------------|
|                               |                                       |                                 | CO <sub>2</sub> to air             | Compounds<br>to river | Final waste<br>flow<br>(sludge) |
| Phenyl acetylene              | 0.456                                 | 0.0009                          | 0.0056                             | 0.0022                | 0.0150                          |
| Benzyl azide                  | 0.595                                 | 0.0012                          | 0.0073                             | 0.0029                | 0.0196                          |
| tBuOH <sup>a</sup>            | 6.984                                 | 0.0140                          | 1.7111                             | 0.6774                | 4.5955                          |
| H <sub>2</sub> O <sup>b</sup> | 120.715                               | 0.2414                          |                                    | 120.4736              |                                 |
| Cu(0)                         | 1.49                                  |                                 |                                    |                       | 1.490                           |
| Chemical factory              | 4xE-13 p                              |                                 |                                    |                       |                                 |

<sup>a</sup>Isobutanol used instead of tBuOH; <sup>b</sup>Sum of H<sub>2</sub>O used as reaction and purification solvent

**Table SI-3.** Inventory for the Himo et al. procedure<sup>3</sup>

| Materials flow                | Quantity (g)<br>for 1 g of<br>product | Process air<br>emissions<br>(g) | Wastewater treatment emissions (g) |                       |                                 |
|-------------------------------|---------------------------------------|---------------------------------|------------------------------------|-----------------------|---------------------------------|
|                               |                                       |                                 | CO <sub>2</sub> to air             | Compounds<br>to river | Final waste<br>flow<br>(sludge) |
| Phenyl acetylene              | 0.456                                 | 0.0010                          | 0.0060                             | 0.0020                | 0.0150                          |
| Benzyl azide                  | 0.595                                 | 0.0010                          | 0.0070                             | 0.0030                | 0.0200                          |
| Sodium ascorbate              | 0.088                                 |                                 | 0.0220                             | 0.0090                | 0.0580                          |
| Copper sulfate                | 0.011                                 |                                 |                                    | 0.0055                | 0.0055                          |
| tBuOH <sup>a</sup>            | 6.984                                 | 0.0140                          | 1.7110                             | 0.6770                | 4.5950                          |
| H <sub>2</sub> O <sup>b</sup> | 158.515                               | 0.3170                          |                                    | 158.1980              |                                 |
| Chemical factory              | 4xE-13 p                              |                                 |                                    |                       |                                 |

<sup>a</sup>Isobutanol used instead of tBuOH; <sup>b</sup>Sum of H<sub>2</sub>O used as reaction and purification solvent

**Table SI-4.** Inventory for the Lal et al. procedure<sup>4</sup>

| Materials flow                       | Quantity (g) for 1 g of product | Process air emissions (g) | Wastewater treatment emissions (g) |                    |                           |
|--------------------------------------|---------------------------------|---------------------------|------------------------------------|--------------------|---------------------------|
|                                      |                                 |                           | CO <sub>2</sub> to air             | Compounds to river | Final waste flow (sludge) |
| Phenyl acetylene                     | 0.456                           | 0.0009                    | 0.0011                             | 0.0004             | 0.0030                    |
| Benzyl azide                         | 0.595                           | 0.0012                    | 0.0015                             | 0.0006             | 0.0039                    |
| CuBr(PPh <sub>3</sub> ) <sub>3</sub> | 0.021                           |                           | 0.0051                             | 0.0020             | 0.0138                    |
| Ethyl acetate <sup>a</sup>           | 16.107 <sup>a</sup>             | 0.0320                    | 3.9460                             | 1.5620             | 10.5980                   |
| Chemical factory                     | 4xE-13 p                        |                           |                                    |                    |                           |

<sup>a</sup>Amount assumed**Table SI-5.** Inventory for the Luciani et al. procedure<sup>5</sup>

| Materials flow                | Quantity (g) for 1 g of product | Process air emissions (g) | Wastewater treatment emissions (g) |                    |                           |
|-------------------------------|---------------------------------|---------------------------|------------------------------------|--------------------|---------------------------|
|                               |                                 |                           | CO <sub>2</sub> to air             | Compounds to river | Final waste flow (sludge) |
| Phenyl acetylene              | 0.456                           | 0.0010                    | 0.0060                             | 0.0020             | 0.0150                    |
| Benzyl azide                  | 0.595                           | 0.0010                    | 0.0070                             | 0.0030             | 0.0200                    |
| Sodium ascorbate              | 0.090                           |                           | 0.0220                             | 0.0090             | 0.0590                    |
| Copper sulfate                | 0.004                           |                           |                                    | 0.0020             | 0.0020                    |
| Polarclean® <sup>a</sup>      | 1.453                           | 0.0030                    | 0.3560                             | 0.1410             | 0.9560                    |
| H <sub>2</sub> O <sup>b</sup> | 4.832                           | 0.0100                    |                                    | 4.822              |                           |
| Chemical factory              | 4xE-13 p                        |                           |                                    |                    |                           |

<sup>a</sup>Emissions deriving from the physiological losses during recovery procedure; <sup>b</sup>Sum of H<sub>2</sub>O used as reaction and purification solvent

## 2.2 Inventories for the needed compounds in the synthesis approaches that were not available in life cycle databases

**Table SI-6.** Synthesis of (1,2-dibromoethyl)benzene<sup>13</sup>

| Materials flow            | Quantity (g) for 1 g of product | Process air emissions (g) | Wastewater treatment emissions (g) |                    |                           |
|---------------------------|---------------------------------|---------------------------|------------------------------------|--------------------|---------------------------|
|                           |                                 |                           | CO <sub>2</sub> to air             | Compounds to river | Final waste flow (sludge) |
| Styrene                   | 0.420                           | 0.0008                    | 0.0062                             | 0.0024             | 0.0166                    |
| Bromine                   | 0.645                           | 0.0013                    | 0.0095 <sup>a</sup>                | 0.0038             | 0.0255                    |
| Dichloromethane           | 7.505                           | 0.0150                    | 1.8387                             | 0.7280             | 4.9383                    |
| Electricity               | 0.000333 KWh                    |                           |                                    |                    |                           |
| Steam                     | 0.0002 MJ                       |                           |                                    |                    |                           |
| Transport (lorry 16-32 t) | 1.00xE-4 tkm                    |                           |                                    |                    |                           |
| Transport (train)         | 6.00xE-4 tkm                    |                           |                                    |                    |                           |
| Chemical factory          | 4xE-13 p                        |                           |                                    |                    |                           |

<sup>a</sup>Emitted as Br<sub>2</sub>

**Table SI-7.** Synthesis of phenyl acetylene<sup>14</sup>

| Materials flow               | Quantity (g)<br>for 1 g of<br>product | Process air<br>emissions<br>(g) | Wastewater treatment emissions (g) |                       |                                 |
|------------------------------|---------------------------------------|---------------------------------|------------------------------------|-----------------------|---------------------------------|
|                              |                                       |                                 | CO <sub>2</sub> to air             | Compounds<br>to river | Final waste<br>flow<br>(sludge) |
| 1-(1,2-dibromoethyl) benzene | 2.692                                 | 0.0054                          | 0.0264                             | 0.0104                | 0.0709                          |
| Sodium hydroxide             | 0.857                                 |                                 |                                    | 0.0367                | 0.0367                          |
| Ethanol                      | 26.855                                | 0.0537                          | 6.5795                             | 2.6049                | 17.6706                         |
| Dichloromethane              | 33.909                                | 0.0678                          | 8.3077                             | 3.2892                | 22.3121                         |
| Hexane                       | 205.800                               | 0.4116                          | 50.4210                            | 19.9626               | 135.4164                        |
| Ethyl acetate                | 5.412                                 | 0.0108                          | 1.3259                             | 0.5250                | 3.5611                          |
| Sodium bromide <sup>a</sup>  |                                       |                                 |                                    | 1.0080                | 1.0080                          |
| Water <sup>a</sup>           |                                       |                                 |                                    | 0.3520                |                                 |
| Silica gel                   | 50                                    |                                 |                                    |                       | 50                              |
| Electricity                  | 0.000333 KWh                          |                                 |                                    |                       |                                 |
| Steam                        | 0.0002 MJ                             |                                 |                                    |                       |                                 |
| Transport (lorry 16-32 t)    | 1.00xE-4 tkm                          |                                 |                                    |                       |                                 |
| Transport (train)            | 6.00xE-4 tkm                          |                                 |                                    |                       |                                 |
| Chemical factory             | 4xE-13 p                              |                                 |                                    |                       |                                 |

<sup>a</sup>Reaction side product**Table SI-8.** Synthesis of sodium azide (NaN<sub>3</sub>)<sup>15</sup>

| Materials flow                 | Quantity (g)<br>for 1 g of<br>product | Process air<br>emissions<br>(g) | Wastewater treatment emissions (g) |                       |                                 |
|--------------------------------|---------------------------------------|---------------------------------|------------------------------------|-----------------------|---------------------------------|
|                                |                                       |                                 | CO <sub>2</sub> to air             | Compounds<br>to river | Final waste<br>flow<br>(sludge) |
| Ethanol <sup>a</sup>           | 2.829                                 | 0.0057                          | 0.5006                             | 0.1982                | 1.3443                          |
| Sodium nitrite                 | 1.171                                 | 0.0023                          |                                    |                       |                                 |
| Sulfuric acid                  | 0.816                                 | 0.0016                          |                                    | 0.4080                | 0.4080                          |
| H <sub>2</sub> O               | 1.905                                 | 0.0038                          |                                    | 1.9012                |                                 |
| Hydrazine hydrate <sup>b</sup> | 0.849                                 |                                 |                                    |                       |                                 |
| Sodium hydroxide               | 0.536                                 |                                 |                                    | 0.2680                | 0.2680                          |
| Tributylamine <sup>c</sup>     | 0.062                                 | 0.0001                          | 0.0152                             | 0.0060                | 0.0408                          |
| Ethanol <sup>d</sup>           |                                       |                                 | 0.1918                             | 0.0760                | 0.5152                          |
| Electricity                    | 0.000333 KWh                          |                                 |                                    |                       |                                 |
| Steam                          | 0.0002 MJ                             |                                 |                                    |                       |                                 |
| Transport (lorry 16-32 t)      | 1.00xE-4 tkm                          |                                 |                                    |                       |                                 |
| Transport (train)              | 6.00xE-4 tkm                          |                                 |                                    |                       |                                 |
| Chemical factory               | 4xE-13 p                              |                                 |                                    |                       |                                 |

<sup>a</sup>Sum of ethanol used as reaction and purification solvent; <sup>b</sup>Hydrazine used instead of hydrazine hydrate; <sup>c</sup>Triethylamine used instead of tributylamine; <sup>d</sup>Reaction side product

**Table SI-9.** Synthesis of benzyl azide<sup>16</sup>

| Materials flow               | Quantity (g)<br>for 1 g of<br>product | Process air<br>emissions<br>(g) | Wastewater treatment emissions (g) |                       |                                 |
|------------------------------|---------------------------------------|---------------------------------|------------------------------------|-----------------------|---------------------------------|
|                              |                                       |                                 | CO <sub>2</sub> to air             | Compounds<br>to river | Final waste<br>flow<br>(sludge) |
| Benzyl chloride              | 0.960                                 | 0.0019                          | 0.0024                             | 0.0009                | 0.0063                          |
| Sodium azide                 | 0.592                                 |                                 |                                    | 0.0202                | 0.0202                          |
| Dimethyl<br>sulfoxide        | 6.962                                 | 0.0139                          | 1.7057                             | 0.6753                | 4.5810                          |
| H <sub>2</sub> O             | 63.291                                | 0.1266                          |                                    | 63.1646               |                                 |
| Hexane                       | 49.992                                | 0.1000                          | 12.2480                            | 4.8492                | 32.8945                         |
| Magnesium<br>sulfate         | 10.000                                |                                 |                                    | 5.0000                | 5.0000                          |
| Sodium chloride <sup>a</sup> |                                       |                                 |                                    | 0.2195                | 0.2195                          |
| Electricity                  | 0.000333 KWh                          |                                 |                                    |                       |                                 |
| Steam                        | 0.0002 MJ                             |                                 |                                    |                       |                                 |
| Transport (lorry<br>16-32 t) | 1.00xE-4 tkm                          |                                 |                                    |                       |                                 |
| Transport (train)            | 6.00xE-4 tkm                          |                                 |                                    |                       |                                 |
| Chemical factory             | 4xE-13 p                              |                                 |                                    |                       |                                 |

<sup>a</sup>Reaction side product**Table SI-10.** Synthesis of sodium ascorbate<sup>17</sup>

| Materials flow                | Quantity (g)<br>for 1 g of<br>product | Process air<br>emissions<br>(g) | Wastewater treatment emissions (g) |                       |                                 |
|-------------------------------|---------------------------------------|---------------------------------|------------------------------------|-----------------------|---------------------------------|
|                               |                                       |                                 | CO <sub>2</sub> to air             | Compounds<br>to river | Final waste<br>flow<br>(sludge) |
| Ascorbic acid                 | 0.889                                 |                                 |                                    |                       |                                 |
| Sodium<br>bicarbonate         | 0.0430                                |                                 |                                    | 0.0215                | 0.0215                          |
| H <sub>2</sub> O              | 0.8890                                | 0.0018                          |                                    | 0.8872                |                                 |
| Isopropanol                   | 8.7350                                | 0.0175                          | 2.1401                             | 0.8473                | 5.7476                          |
| H <sub>2</sub> O <sup>a</sup> |                                       |                                 |                                    | 0.0910                |                                 |
| CO <sub>2</sub> <sup>a</sup>  |                                       |                                 | 0.2200                             |                       |                                 |
| Electricity                   | 0.000333 KWh                          |                                 |                                    |                       |                                 |
| Steam                         | 0.0002 MJ                             |                                 |                                    |                       |                                 |
| Transport (lorry<br>16-32 t)  | 1.00xE-4 tkm                          |                                 |                                    |                       |                                 |
| Transport (train)             | 6.00xE-4 tkm                          |                                 |                                    |                       |                                 |
| Chemical factory              | 4xE-13 p                              |                                 |                                    |                       |                                 |

<sup>a</sup>Reaction side product**Table SI-11.** Synthesis of iron (III) nitrate [Fe(NO<sub>3</sub>)<sub>3</sub>]<sup>18</sup>

| Materials flow | Quantity (g)<br>for 1 g of<br>product | Process air<br>emissions<br>(g) | Wastewater treatment emissions (g) |                       |                                 |
|----------------|---------------------------------------|---------------------------------|------------------------------------|-----------------------|---------------------------------|
|                |                                       |                                 | CO <sub>2</sub> to air             | Compounds<br>to river | Final waste<br>flow<br>(sludge) |
| Nitric acid    | 1.578                                 | 0.0032                          |                                    |                       |                                 |

|                               |              |        |                     |        |        |
|-------------------------------|--------------|--------|---------------------|--------|--------|
| H <sub>2</sub> O              | 0.674        | 0.0013 |                     | 0.6727 |        |
| Iron pellets                  | 0.795        |        |                     |        | 0.5640 |
| NO <sub>2</sub> <sup>a</sup>  |              |        | 0.5700 <sup>b</sup> |        |        |
| H <sub>2</sub> O <sup>a</sup> |              |        |                     | 0.2230 |        |
| Electricity                   | 0.000333 KWh |        |                     |        |        |
| Steam                         | 0.0002 MJ    |        |                     |        |        |
| Transport (lorry<br>16-32 t)  | 1.00xE-4 tkm |        |                     |        |        |
| Transport (train)             | 6.00xE-4 tkm |        |                     |        |        |
| Chemical factory              | 4xE-13 p     |        |                     |        |        |

<sup>a</sup>Reaction side product; <sup>b</sup>Emitted as NO<sub>2</sub>

**Table SI-12.** Synthesis of prop-2-yn-1-ol<sup>19</sup>

| Materials flow                    | Quantity (g)<br>for 1 g of<br>product | Process air<br>emissions<br>(g) | Wastewater treatment emissions (g) |                       |                                 |
|-----------------------------------|---------------------------------------|---------------------------------|------------------------------------|-----------------------|---------------------------------|
|                                   |                                       |                                 | CO <sub>2</sub> to air             | Compounds<br>to river | Final waste<br>flow<br>(sludge) |
| Epichlorohydrin                   | 3.495                                 | 0.0070                          | 0.4624                             | 0.1831                | 1.2418                          |
| Fe(NO <sub>3</sub> ) <sub>3</sub> | 0.012                                 |                                 |                                    |                       | 0.0116                          |
| Sodium                            | 2.621                                 |                                 |                                    | 1.7710                |                                 |
| Ammonia (liquid)                  | 16.553                                | 0.0331                          | 3.8984                             | 1.5435                | 10.4701                         |
| Ammonium<br>chloride              | 5.339                                 |                                 |                                    | 5.3390                |                                 |
| Diethyl ether                     | 10.339                                | 0.0207                          | 2.5331                             | 1.0029                | 6.8031                          |
| Potassium<br>carbonate            | 0.485                                 |                                 |                                    | 0.0470                | 0.3191                          |
| Succinic acid                     | 0.045                                 |                                 | 0.0110                             | 0.0044                | 0.0296                          |
| Electricity                       | 0.000333 KWh                          |                                 |                                    |                       |                                 |
| Steam                             | 0.0002 MJ                             |                                 |                                    |                       |                                 |
| Transport (lorry<br>16-32 t)      | 1.00xE-4 tkm                          |                                 |                                    |                       |                                 |
| Transport (train)                 | 6.00xE-4 tkm                          |                                 |                                    |                       |                                 |
| Chemical factory                  | 4xE-13 p                              |                                 |                                    |                       |                                 |

**Table SI-13.** Synthesis of 3-bromoprop-1-yne<sup>20</sup>

| Materials flow                         | Quantity (g)<br>for 1 g of<br>product | Process air<br>emissions<br>(g) | Wastewater treatment emissions (g) |                       |                                 |
|----------------------------------------|---------------------------------------|---------------------------------|------------------------------------|-----------------------|---------------------------------|
|                                        |                                       |                                 | CO <sub>2</sub> to air             | Compounds<br>to river | Final waste<br>flow<br>(sludge) |
| prop-2-yn-1-ol                         | 0.596                                 | 0.0012                          | 0.0306                             | 0.0121                | 0.0823                          |
| Phosphorous<br>tribromide <sup>a</sup> | 1.010                                 | 0.0020                          |                                    | 0.1232 <sup>b</sup>   | 0.1232                          |
| Toluene                                | 1.490                                 | 0.0030                          | 0.3651                             | 0.1445                | 0.9804                          |
| H <sub>2</sub> O                       | 0.882                                 | 0.0018                          |                                    | 0.8802                |                                 |
| Electricity                            | 0.000333 KWh                          |                                 |                                    |                       |                                 |
| Steam                                  | 0.0002 MJ                             |                                 |                                    |                       |                                 |
| Transport (lorry<br>16-32 t)           | 1.00xE-4 tkm                          |                                 |                                    |                       |                                 |

|                   |              |  |  |  |  |
|-------------------|--------------|--|--|--|--|
| Transport (train) | 6.00xE-4 tkm |  |  |  |  |
| Chemical factory  | 4xE-13 p     |  |  |  |  |

<sup>a</sup>PCl<sub>3</sub> used as proxy of PBr<sub>3</sub>; <sup>b</sup>Emitted as PBr<sub>2</sub>OH

**Table SI-14.** Synthesis of 2-propyn-1-amine<sup>21</sup>

| Materials flow            | Quantity (g) for 1 g of product | Process air emissions (g) | Wastewater treatment emissions (g) |                     |                           |
|---------------------------|---------------------------------|---------------------------|------------------------------------|---------------------|---------------------------|
|                           |                                 |                           | CO <sub>2</sub> to air             | Compounds to river  | Final waste flow (sludge) |
| 3-bromoprop-1-yne         | 3.457                           | 0.0069                    | 0.3176                             | 0.1257              | 0.8530                    |
| Ammonia (liquid)          | 30.755                          | 0.0615                    | 7.5350 <sup>a</sup>                | 2.9832 <sup>b</sup> | 20.2368                   |
| Sodium amide              | 2.493                           |                           |                                    | 0.6795              | 0.6795                    |
| H <sub>2</sub> O          | 5.810                           | 0.0116                    |                                    | 5.7984              |                           |
| Potassium hydroxide       | 5.810                           |                           |                                    | 2.9050              | 2.9050                    |
| Electricity               | 0.000333 KWh                    |                           |                                    |                     |                           |
| Steam                     | 0.0002 MJ                       |                           |                                    |                     |                           |
| Transport (lorry 16-32 t) | 1.00xE-4 tkm                    |                           |                                    |                     |                           |
| Transport (train)         | 6.00xE-4 tkm                    |                           |                                    |                     |                           |
| Chemical factory          | 4xE-13 p                        |                           |                                    |                     |                           |

<sup>a</sup>Emitted as gaseous ammonia; <sup>b</sup>Emitted as ammonium hydroxide

**Table SI-15** Synthesis of sodium acetate<sup>22</sup>

| Materials flow            | Quantity (g) for 1 g of product | Process air emissions (g) | Wastewater treatment emissions (g) |                    |                           |
|---------------------------|---------------------------------|---------------------------|------------------------------------|--------------------|---------------------------|
|                           |                                 |                           | CO <sub>2</sub> to air             | Compounds to river | Final waste flow (sludge) |
| Sodium Hydroxide          | 0.513                           |                           |                                    | 0.013              | 0.0123                    |
| Acetic acid               | 0.772                           | 0.002                     | 0.009                              | 0.004              | 0.025                     |
| H <sub>2</sub> O          | 0.513                           | 0.001                     |                                    | 0.731 <sup>a</sup> |                           |
| Electricity               | 0.000333 KWh                    |                           |                                    |                    |                           |
| Steam                     | 0.0002 MJ                       |                           |                                    |                    |                           |
| Transport (lorry 16-32 t) | 1.00xE-4 tkm                    |                           |                                    |                    |                           |
| Transport (train)         | 6.00xE-4 tkm                    |                           |                                    |                    |                           |
| Chemical factory          | 4xE-13 p                        |                           |                                    |                    |                           |

<sup>a</sup>Sum of water initially used and waste side product

**Table SI-16.** Synthesis of *N*-(prop-2-yn-1-yl)acetamide<sup>23</sup>

| Materials flow   | Quantity (g) for 1 g of product | Process air emissions (g) | Wastewater treatment emissions (g) |                    |                           |
|------------------|---------------------------------|---------------------------|------------------------------------|--------------------|---------------------------|
|                  |                                 |                           | CO <sub>2</sub> to air             | Compounds to river | Final waste flow (sludge) |
| 2-propyn-1-amine | 0.644                           | 0.0013                    | 0.0189                             | 0.0075             | 0.0509                    |
| Acetic anhydride | 1.314                           | 0.0026                    | 0.0644                             | 0.0255             | 0.1729                    |

|                              |              |        |        |         |         |
|------------------------------|--------------|--------|--------|---------|---------|
| Sodium acetate               | 1.056        |        | 0.2586 | 0.1024  | 0.6947  |
| H <sub>2</sub> O             | 11.700       | 0.0234 |        | 11.6766 |         |
| Sodium chloride              | 4.212        |        |        | 2.1060  | 2.1060  |
| Dichloromethane              | 17.290       | 0.0346 | 4.2361 | 1.6771  | 11.3768 |
| Diethyl ether                | 2.824        | 0.0056 | 0.6919 | 0.2739  | 1.8582  |
| Acetic acid <sup>a</sup>     |              |        | 0.1515 | 0.0600  | 0.4068  |
| Electricity                  | 0.000333 KWh |        |        |         |         |
| Steam                        | 0.0002 MJ    |        |        |         |         |
| Transport (lorry<br>16-32 t) | 1.00xE-4 tkm |        |        |         |         |
| Transport (train)            | 6.00xE-4 tkm |        |        |         |         |
| Chemical factory             | 4xE-13 p     |        |        |         |         |

<sup>a</sup>Reaction side product

**Table SI-17.** Synthesis of N-((1-benzyl-1H-1,2,3-triazol-4-yl)methyl)acetamide<sup>23</sup>

| Materials flow               | Quantity (g)<br>for 1 g of<br>product | Process air<br>emissions<br>(g) | Wastewater treatment emissions (g) |                       |                                 |
|------------------------------|---------------------------------------|---------------------------------|------------------------------------|-----------------------|---------------------------------|
|                              |                                       |                                 | CO <sub>2</sub> to air             | Compounds<br>to river | Final waste<br>flow<br>(sludge) |
| N-(prop-2-yn-1-yl)acetamide  | 0.624                                 | 0.0012                          | 0.0011                             | 0.0004                | 0.0030                          |
| Benzyl azide                 | 0.856                                 | 0.0017                          | 0.0015                             | 0.0006                | 0.0041                          |
| Copper sulfate               | 0.032                                 |                                 |                                    | 0.0160                | 0.0160                          |
| Ascorbic acid                | 0.113                                 |                                 |                                    |                       |                                 |
| Sodium hydroxide             | 0.026                                 |                                 |                                    |                       |                                 |
| H <sub>2</sub> O             | 14.755                                | 0.0295                          |                                    | 14.7255               |                                 |
| Ammonia                      | 0.999                                 | 0.0020                          | 0.2448 <sup>a</sup>                | 0.0969                | 0.6573                          |
| Dichloromethane              | 46.057                                | 0.0921                          | 11.2840                            | 4.4675                | 30.3055                         |
| Diethyl ether                | 11.726                                | 0.0235                          | 2.8729                             | 1.1374                | 7.7157                          |
| Electricity                  | 0.000333 KWh                          |                                 |                                    |                       |                                 |
| Steam                        | 0.0002 MJ                             |                                 |                                    |                       |                                 |
| Transport (lorry<br>16-32 t) | 1.00xE-4 tkm                          |                                 |                                    |                       |                                 |
| Transport (train)            | 6.00xE-4 tkm                          |                                 |                                    |                       |                                 |
| Chemical factory             | 4xE-13 p                              |                                 |                                    |                       |                                 |

<sup>a</sup>Emitted as gaseous NH<sub>3</sub>

**Table SI-18.** Synthesis of (1-benzyl-1H-1,2,3-triazol-4-yl)methanamine (ligand)<sup>24</sup>

| Materials flow                                      | Quantity (g)<br>for 1 g of<br>product | Process air<br>emissions<br>(g) | Wastewater treatment emissions (g) |                       |                                 |
|-----------------------------------------------------|---------------------------------------|---------------------------------|------------------------------------|-----------------------|---------------------------------|
|                                                     |                                       |                                 | CO <sub>2</sub> to air             | Compounds<br>to river | Final waste<br>flow<br>(sludge) |
| N-((1-benzyl-1H-1,2,3-triazol-4-yl)methyl)acetamide | 1.349                                 | 0.0027                          | 0.0264                             | 0.0105                | 0.0710                          |
| Hydrochloric acid                                   | 0.463                                 | 0.0009                          | 0.4630 <sup>b</sup>                |                       |                                 |

|                           |                 |        |        |        |        |
|---------------------------|-----------------|--------|--------|--------|--------|
| H <sub>2</sub> O          | 0.983           | 0.0020 |        | 0.9810 |        |
| Dichloromethane           | 1.659           | 0.0033 | 0.4065 | 0.1609 | 1.0916 |
| Methanol                  | 3.956           | 0.0079 | 0.9692 | 0.3837 | 2.6030 |
| Acetic acid <sup>a</sup>  |                 |        | 0.0821 | 0.0325 | 0.2204 |
| Electricity               | 0.000333<br>KWh |        |        |        |        |
| Steam                     | 0.0002 MJ       |        |        |        |        |
| Transport (lorry 16-32 t) | 1.00xE-4 tkm    |        |        |        |        |
| Transport (train)         | 6.00xE-4 tkm    |        |        |        |        |
| Chemical factory          | 4xE-13 p        |        |        |        |        |

<sup>a</sup>Reaction side product; <sup>b</sup>Emitted as gaseous hydrochloric acid

**Table SI-19.** Synthesis of copper (I) bromide (Adapted from ref. 24)

| Materials flow              | Quantity (g) for 1 g of product | Process air emissions (g) | Wastewater treatment emissions (g) |                    |                           |
|-----------------------------|---------------------------------|---------------------------|------------------------------------|--------------------|---------------------------|
|                             |                                 |                           | CO <sub>2</sub> to air             | Compounds to river | Final waste flow (sludge) |
| Copper sulfate              | 2.393                           |                           |                                    | 0.0837             | 0.0837                    |
| Sodium bromide <sup>a</sup> | 2.185                           |                           |                                    | 0.3753             | 0.3753                    |
| Sodium sulfite              | 0.945                           |                           |                                    | 0.0331             | 0.0331                    |
| H <sub>2</sub> O            | 22.490                          | 0.0450                    |                                    | 22.3101            |                           |
| Sodium sulfate <sup>b</sup> |                                 |                           | 0.5216                             | 1.0645             | 1.0645                    |
| Sulfuric acid <sup>b</sup>  |                                 |                           | 0.1801                             | 0.3675             | 0.3675                    |
| Electricity                 | 0.000333 KWh                    |                           |                                    |                    |                           |
| Steam                       | 0.0002 MJ                       |                           |                                    |                    |                           |
| Transport (lorry 16-32 t)   | 1.00xE-4 tkm                    |                           |                                    |                    |                           |
| Transport (train)           | 6.00xE-4 tkm                    |                           |                                    |                    |                           |
| Chemical factory            | 4xE-13 p                        |                           |                                    |                    |                           |

<sup>a</sup>Sodium chloride used instead of sodium bromide; <sup>b</sup>Reaction side product

**Table SI-20.** Synthesis of triphenylphosphine (PPh<sub>3</sub>)<sup>25</sup>

| Materials flow               | Quantity (g) for 1 g of product | Process air emissions (g) | Wastewater treatment emissions (g) |                    |                           |
|------------------------------|---------------------------------|---------------------------|------------------------------------|--------------------|---------------------------|
|                              |                                 |                           | CO <sub>2</sub> to air             | Compounds to river | Final waste flow (sludge) |
| Sodium                       | 0.558                           |                           |                                    | 0.2351             | 0.2351                    |
| Chlorobenzene                | 1.382                           | 0.0028                    | 0.0232                             | 0.0092             | 0.0623                    |
| Phosphorous chloride         | 0.544                           |                           |                                    | 0.0103             | 0.0136                    |
| Toluene                      | 5.260                           | 0.0105                    | 1.2888                             | 0.5102             | 3.4613                    |
| Sodium chloride <sup>a</sup> |                                 |                           |                                    | 0.5790             | 0.5790                    |
| Electricity                  | 0.000333 KWh                    |                           |                                    |                    |                           |
| Steam                        | 0.0002 MJ                       |                           |                                    |                    |                           |
| Transport (lorry 16-32 t)    | 1.00xE-4 tkm                    |                           |                                    |                    |                           |
| Transport (train)            | 6.00xE-4 tkm                    |                           |                                    |                    |                           |

|                  |          |  |  |  |  |
|------------------|----------|--|--|--|--|
| Chemical factory | 4xE-13 p |  |  |  |  |
|------------------|----------|--|--|--|--|

<sup>a</sup>Reaction side product

**Table SI-21.** Synthesis of tris(triphenylphosphine)copper(I) bromide [CuBr(PPh<sub>3</sub>)<sub>3</sub>]<sup>26</sup>

| Materials flow            | Quantity (g) for 1 g of product | Process air emissions (g) | Wastewater treatment emissions (g) |                    |                           |
|---------------------------|---------------------------------|---------------------------|------------------------------------|--------------------|---------------------------|
|                           |                                 |                           | CO <sub>2</sub> to air             | Compounds to river | Final waste flow (sludge) |
| Copper (I) bromide        | 0.169                           |                           |                                    | 0.0076             | 0.0076                    |
| Triphenylphosphine        | 0.929                           |                           | 0.2277                             | 0.0902             | 0.6116                    |
| Acetonitrile              | 19.712                          | 0.0394                    | 4.8294                             | 1.9121             | 12.9705                   |
| Electricity               | 0.000333 KWh                    |                           |                                    |                    |                           |
| Steam                     | 0.0002 MJ                       |                           |                                    |                    |                           |
| Transport (lorry 16-32 t) | 1.00xE-4 tkm                    |                           |                                    |                    |                           |
| Transport (train)         | 6.00xE-4 tkm                    |                           |                                    |                    |                           |
| Chemical factory          | 4xE-13 p                        |                           |                                    |                    |                           |

**Table SI-22.** Synthesis of Polarclean® (Adapted from ref. 27)

| Materials flow            | Quantity (g) for 1 g of product | Process air emissions (g) | Wastewater treatment emissions (g) |                    |                           |
|---------------------------|---------------------------------|---------------------------|------------------------------------|--------------------|---------------------------|
|                           |                                 |                           | CO <sub>2</sub> to air             | Compounds to river | Final waste flow (sludge) |
| Butadiene                 | 0.055                           |                           |                                    |                    |                           |
| Hydrogen cyanide          | 0.055                           |                           |                                    |                    |                           |
| Sodium hydroxyde          | 0.040                           |                           |                                    |                    |                           |
| Sulfuric acid             | 0.100                           |                           |                                    |                    |                           |
| H <sub>2</sub> O          | 0.037                           |                           |                                    |                    |                           |
| Acetic anhydride          | 0.229                           |                           |                                    |                    |                           |
| Methanol                  | 0.652                           |                           |                                    |                    |                           |
| Thionyl chloride          | 0.242                           |                           |                                    |                    |                           |
| Dimethylacetamide         | 0.177                           |                           |                                    |                    |                           |
| Triethylamine             | 0.128                           |                           |                                    |                    |                           |
| Toluene                   | 0.094                           |                           |                                    |                    |                           |
| Electricity               | 0.000333 KWh                    |                           |                                    |                    |                           |
| Steam                     | 0.0002 MJ                       |                           |                                    |                    |                           |
| Transport (lorry 16-32 t) | 1.00xE-4 tkm                    |                           |                                    |                    |                           |
| Transport (train)         | 6.00xE-4 tkm                    |                           |                                    |                    |                           |
| Chemical factory          | 4xE-13 p                        |                           |                                    |                    |                           |

**Table SI-23** List of the activities used for the inventories construction, retrieved from Ecoinvent database (version 3.11)

| Source                                                           | Comments |
|------------------------------------------------------------------|----------|
| Acetic acid {GLO}  market for acetic acid   Cut-off, S           |          |
| Acetic anhydride {GLO}  market for acetic anhydride   Cut-off, S |          |

|                                                                                                                                                              |                                                                              |
|--------------------------------------------------------------------------------------------------------------------------------------------------------------|------------------------------------------------------------------------------|
| Activated silica {GLO}  market for activated silica   Cut-off, S                                                                                             |                                                                              |
| Acetonitrile {GLO}  market for acetonitrile   Cut-off, S                                                                                                     |                                                                              |
| Ammonia, anhydrous, liquid {RER}  market for ammonia, anhydrous, liquid   Cut-off, S                                                                         |                                                                              |
| Ammonium chloride {GLO}  market for ammonium chloride   Cut-off, S                                                                                           |                                                                              |
| Ascorbic acid {GLO}  market for ascorbic acid   Cut-off, S                                                                                                   |                                                                              |
| Benzyl chloride {RER}  market for benzyl chloride   Cut-off, S                                                                                               |                                                                              |
| Bromine {GLO}  market for bromine   Cut-off,                                                                                                                 |                                                                              |
| Butadiene {RER}  market for butadiene   Cut-off, S                                                                                                           |                                                                              |
| Chemical factory, organics {GLO}  market for chemical factory, organics   Cut-off, S                                                                         |                                                                              |
| Copper, cathode {GLO}  market for copper, cathode   Cut-off, S                                                                                               |                                                                              |
| Copper sulfate {GLO}  market for copper sulfate   Cut-off, S                                                                                                 |                                                                              |
| Dichloromethane {RER}  market for dichloromethane   Cut-off, S                                                                                               |                                                                              |
| Diethyl ether, without water, in 99.95% solution state {RER}  market for diethyl ether, without water, in 99.95% solution state   Cut-off, S                 |                                                                              |
| Dimethylacetamide {GLO}  market for dimethylacetamide   Cut-off, S                                                                                           |                                                                              |
| Dimethyl sulfoxide {GLO}  market for dimethyl sulfoxide   Cut-off, S                                                                                         |                                                                              |
| Electricity, low voltage {RER}  market group for electricity, low voltage   Cut-off, S                                                                       |                                                                              |
| Ethanol, without water, in 99.7% solution state, from ethylene {RER}  market for ethanol, without water, in 99.7% solution state, from ethylene   Cut-off, S |                                                                              |
| Epichlorohydrin {GLO}  market for epichlorohydrin   Cut-off, S                                                                                               |                                                                              |
| Ethyl acetate {GLO}  market for ethyl acetate   Cut-off, S                                                                                                   | For the Lal et al. procedure, its amount as purification solvent was assumed |
| Heat, from steam, in chemical industry {RER}  market for heat, from steam, in chemical industry   Cut-off, S                                                 |                                                                              |
| Hexane {GLO}  market for hexane   Cut-off, S                                                                                                                 |                                                                              |
| Hydrochloric acid, without water, in 30% solution state {RER}  market for hydrochloric acid, without water, in 30% solution state   Cut-off, S               |                                                                              |
| Hydrogen cyanide {RER}  market for hydrogen cyanide   Cut-off, S                                                                                             |                                                                              |
| Hydrazine {RER}  market for hydrazine   Cut-off, S                                                                                                           | For the synthesis of sodium azide, was used as a proxy for hydrazine hydrate |
| Iron pellet {GLO}  market for iron pellet   Cut-off, S                                                                                                       |                                                                              |
| Isobutanol {RER}  market for isobutanol   Cut-off, S                                                                                                         | For the Chan et al., Rostovtsev et al. and Himo et al.                       |

|                                                                                                                                              |                                                                                       |
|----------------------------------------------------------------------------------------------------------------------------------------------|---------------------------------------------------------------------------------------|
|                                                                                                                                              | procedure, was used as a proxy for tBuOH                                              |
| Isopropanol {RER}  market for isopropanol   Cut-off, S                                                                                       |                                                                                       |
| Magnesium sulfate {GLO}  market for magnesium sulfate   Cut-off, S                                                                           |                                                                                       |
| Methanol {RER}  market for methanol   Cut-off, S                                                                                             |                                                                                       |
| Monochlorobenzene {RER}  market for monochlorobenzene   Cut-off, S                                                                           |                                                                                       |
| Nitric acid, without water, in 50% solution state {RER w/o RU}  market for nitric acid, without water, in 50% solution state   Cut-off, S    |                                                                                       |
| Phosphorous chloride {RER}  market for phosphorous chloride   Cut-off, S                                                                     | For the synthesis of -bromoprop-1-yne, was used as a proxy for phosphorous tribromide |
| Potassium carbonate {GLO}  market for potassium carbonate   Cut-off, S                                                                       |                                                                                       |
| Potassium hydroxide {GLO}  market for potassium hydroxide   Cut-off, S                                                                       |                                                                                       |
| Sodium {GLO}  market for sodium   Cut-off, S                                                                                                 |                                                                                       |
| Sodium amide {RER}  market for sodium amide   Cut-off, S                                                                                     |                                                                                       |
| Sodium bicarbonate {RER}  market for sodium bicarbonate   Cut-off, S                                                                         |                                                                                       |
| Sodium chloride, powder {GLO}  market for sodium chloride, powder   Cut-off, S                                                               | For the synthesis of copper (I) bromide, was used as a proxy for sodium bromide       |
| Sodium hydroxide, without water, in 50% solution state {RER}  market for sodium hydroxide, without water, in 50% solution state   Cut-off, S |                                                                                       |
| Sodium nitrite {RER}  market for sodium nitrite   Cut-off, S                                                                                 |                                                                                       |
| Sodium sulfite {RER}  market for sodium sulfite   Cut-off, S                                                                                 |                                                                                       |
| Succinic acid {GLO}  market for succinic acid   Cut-off, S                                                                                   |                                                                                       |
| Sulfuric acid {RER}  market for sulfuric acid   Cut-off, S                                                                                   |                                                                                       |
| Styrene {RER}  market for styrene   Cut-off, S                                                                                               |                                                                                       |
| Thionyl chloride {RER}  market for thionyl chloride   Cut-off, S                                                                             |                                                                                       |
| Toluene, liquid {RER}  market for toluene, liquid   Cut-off, S                                                                               |                                                                                       |
| Transport, freight, lorry 16-32 metric ton, EURO6 {RER}  market for transport, freight, lorry 16-32 metric ton, EURO6   Cut-off, S           |                                                                                       |
| Transport, freight train {RER}  market group for transport, freight train   Cut-off, S                                                       |                                                                                       |
| Triethyl amine {GLO}  market for triethyl amine   Cut-off, S                                                                                 | For the synthesis of sodium azide, was used as a proxy for tributyl amine             |
| Water, deionised {Europe without Switzerland}  market for water, deionised   Cut-off, S                                                      |                                                                                       |

### 3. LCA impact assessment dataset

**Table SI-24.** Midpoint characterization (%) of the Chan et al. procedure (ReCiPe 2016)

| Impact category                                | Total (%) | Synthetic procedure | Phenyl acetylene | Benzyl azide | Sodium ascorbate | Copper sulfate | Ligand  | tBuOH   | H <sub>2</sub> O | Chemical factory |
|------------------------------------------------|-----------|---------------------|------------------|--------------|------------------|----------------|---------|---------|------------------|------------------|
| <i>Global warming</i>                          | 100       | 0.5088              | 64.0116          | 13.4661      | 0.2050           | 0.0096         | 14.5222 | 7.2623  | 0.0006           | 0.0138           |
| <i>Stratospheric ozone depletion</i>           | 100       | 0.0000              | 78.2916          | 0.6016       | 0.0191           | 0.0020         | 20.7617 | 0.3227  | 0.0001           | 0.0011           |
| <i>Ionizing radiation</i>                      | 100       | 0.0000              | 40.5984          | 16.6123      | 0.3469           | 0.0350         | 13.7645 | 28.5900 | 0.0021           | 0.0507           |
| <i>Ozone formation. Human health</i>           | 100       | 0.0000              | 68.6175          | 13.0413      | 0.1403           | 0.0259         | 13.5505 | 4.6093  | 0.0004           | 0.0148           |
| <i>Fine particulate matter formation</i>       | 100       | 0.0000              | 53.2939          | 9.6282       | 0.1175           | 0.0841         | 33.3623 | 3.4869  | 0.0008           | 0.0262           |
| <i>Ozone formation. Terrestrial ecosystems</i> | 100       | 0.0000              | 68.6558          | 13.7226      | 0.1453           | 0.0228         | 12.7471 | 4.6930  | 0.0003           | 0.0131           |
| <i>Terrestrial acidification</i>               | 100       | 0.0000              | 37.1339          | 6.1247       | 0.0836           | 0.0660         | 54.2715 | 2.3036  | 0.0006           | 0.0161           |
| <i>Freshwater eutrophication</i>               | 100       | 0.0000              | 57.7573          | 14.2696      | 0.2497           | 0.0607         | 19.7140 | 7.9214  | 0.0006           | 0.0266           |
| <i>Marine eutrophication</i>                   | 100       | 0.0000              | 17.8443          | 31.6922      | 0.4518           | 0.0167         | 46.7066 | 3.2804  | 0.0004           | 0.0075           |
| <i>Terrestrial ecotoxicity</i>                 | 100       | 0.0000              | 58.7183          | 23.0164      | 0.2518           | 0.1473         | 10.8713 | 6.9076  | 0.0010           | 0.0863           |
| <i>Freshwater ecotoxicity</i>                  | 100       | 0.0000              | 32.1124          | 56.2608      | 0.0218           | 0.0864         | 11.1284 | 0.3853  | 0.0002           | 0.0047           |
| <i>Marine ecotoxicity</i>                      | 100       | 0.0000              | 61.4418          | 19.7390      | 0.2625           | 0.2170         | 10.9525 | 7.3001  | 0.0013           | 0.0856           |
| <i>Human carcinogenic toxicity</i>             | 100       | 0.0000              | 68.7097          | 10.1446      | 0.1273           | 0.2214         | 16.6279 | 4.0715  | 0.0014           | 0.0961           |
| <i>Human non-carcinogenic toxicity</i>         | 100       | 0.0000              | 74.0291          | 10.7022      | 0.1272           | 0.5438         | 10.7227 | 3.7813  | 0.0009           | 0.0929           |
| <i>Land use</i>                                | 100       | 0.0000              | 63.6297          | 16.4691      | 0.7521           | 0.0817         | 9.6006  | 9.3838  | 0.0008           | 0.0823           |
| <i>Mineral resource scarcity</i>               | 100       | 0.0000              | 59.0382          | 23.0401      | 0.2089           | 0.4792         | 11.4807 | 5.5930  | 0.0012           | 0.1587           |
| <i>Fossil resource scarcity</i>                | 100       | 0.0000              | 62.8897          | 17.3690      | 0.2116           | 0.0051         | 11.4337 | 8.0836  | 0.0003           | 0.0069           |
| <i>Water consumption</i>                       | 100       | -0.1410             | 49.2777          | 12.2626      | 0.2108           | 0.0268         | 10.8582 | 27.3433 | 0.1465           | 0.0151           |

**Table SI-25.** Midpoint characterization (units) of the Chan et al. procedure (ReCiPe 2016)

| Impact category                                | Unit                    | Total    | Synthetic procedure | Phenyl acetylene | Benzyl azide | Sodium ascorbate | Copper sulfate | Ligand   | tBuOH    | H <sub>2</sub> O | Chemical factory |
|------------------------------------------------|-------------------------|----------|---------------------|------------------|--------------|------------------|----------------|----------|----------|------------------|------------------|
| <i>Global warming</i>                          | kg CO <sub>2</sub> eq   | 4.56E-01 | 2.32E-03            | 2.92E-01         | 6.14E-02     | 9.34E-04         | 4.37E-05       | 6.62E-02 | 3.31E-02 | 2.51E-06         | 6.30E-05         |
| <i>Stratospheric ozone depletion</i>           | kg CFC11 eq             | 2.06E-06 | 0.00E+00            | 1.62E-06         | 1.24E-08     | 3.94E-10         | 4.18E-11       | 4.29E-07 | 6.66E-09 | 1.88E-12         | 2.33E-11         |
| <i>Ionizing radiation</i>                      | kBq Co-60 eq            | 9.12E-04 | 0.00E+00            | 3.70E-04         | 1.51E-04     | 3.16E-06         | 3.19E-07       | 1.26E-04 | 2.61E-04 | 1.93E-08         | 4.63E-07         |
| <i>Ozone formation. Human health</i>           | kg NO <sub>x</sub> eq   | 1.32E-03 | 0.00E+00            | 9.05E-04         | 1.72E-04     | 1.85E-06         | 3.42E-07       | 1.79E-04 | 6.08E-05 | 4.71E-09         | 1.95E-07         |
| <i>Fine particulate matter formation</i>       | kg PM <sub>2.5</sub> eq | 7.77E-04 | 0.00E+00            | 4.14E-04         | 7.48E-05     | 9.13E-07         | 6.53E-07       | 2.59E-04 | 2.71E-05 | 6.58E-09         | 2.03E-07         |
| <i>Ozone formation. Terrestrial ecosystems</i> | kg NO <sub>x</sub> eq   | 1.54E-03 | 0.00E+00            | 1.05E-03         | 2.11E-04     | 2.23E-06         | 3.49E-07       | 1.96E-04 | 7.21E-05 | 4.92E-09         | 2.01E-07         |
| <i>Terrestrial acidification</i>               | kg SO <sub>2</sub> eq   | 3.07E-03 | 0.00E+00            | 1.14E-03         | 1.88E-04     | 2.56E-06         | 2.02E-06       | 1.66E-03 | 7.06E-05 | 1.87E-08         | 4.95E-07         |
| <i>Freshwater eutrophication</i>               | kg P eq                 | 1.98E-05 | 0.00E+00            | 1.14E-05         | 2.82E-06     | 4.94E-08         | 1.20E-08       | 3.90E-06 | 1.57E-06 | 1.23E-10         | 5.27E-09         |
| <i>Marine eutrophication</i>                   | kg N eq                 | 9.08E-06 | 0.00E+00            | 1.62E-06         | 2.88E-06     | 4.10E-08         | 1.51E-09       | 4.24E-06 | 2.98E-07 | 3.32E-11         | 6.81E-10         |
| <i>Terrestrial ecotoxicity</i>                 | kg 1,4-DCB              | 3.26E+00 | 0.00E+00            | 1.91E+00         | 7.50E-01     | 8.21E-03         | 4.80E-03       | 3.54E-01 | 2.25E-01 | 3.40E-05         | 2.81E-03         |

|                                        |                          |          |           |          |          |          |          |          |          |          |          |
|----------------------------------------|--------------------------|----------|-----------|----------|----------|----------|----------|----------|----------|----------|----------|
| <i>Freshwater ecotoxicity</i>          | kg 1,4-DCB               | 4.96E-03 | 0.00E+00  | 1.59E-03 | 2.79E-03 | 1.08E-06 | 4.28E-06 | 5.52E-04 | 1.91E-05 | 9.98E-09 | 2.33E-07 |
| <i>Marine ecotoxicity</i>              | kg 1,4-DCB               | 3.59E-03 | 0.00E+00  | 2.21E-03 | 7.09E-04 | 9.43E-06 | 7.80E-06 | 3.93E-04 | 2.62E-04 | 4.82E-08 | 3.08E-06 |
| <i>Human carcinogenic toxicity</i>     | kg 1,4-DCB               | 2.44E-03 | 0.00E+00  | 1.68E-03 | 2.48E-04 | 3.11E-06 | 5.41E-06 | 4.06E-04 | 9.95E-05 | 3.43E-08 | 2.35E-06 |
| <i>Human non-carcinogenic toxicity</i> | kg 1,4-DCB               | 1.27E-01 | 0.00E+00  | 9.41E-02 | 1.36E-02 | 1.62E-04 | 6.91E-04 | 1.36E-02 | 4.80E-03 | 1.21E-06 | 1.18E-04 |
| <i>Land use</i>                        | m <sup>2</sup> a crop eq | 9.39E-03 | 0.00E+00  | 5.98E-03 | 1.55E-03 | 7.06E-05 | 7.67E-06 | 9.02E-04 | 8.81E-04 | 7.45E-08 | 7.73E-06 |
| <i>Mineral resource scarcity</i>       | kg Cu eq                 | 1.66E-03 | 0.00E+00  | 9.77E-04 | 3.81E-04 | 3.46E-06 | 7.93E-06 | 1.90E-04 | 9.26E-05 | 1.93E-08 | 2.63E-06 |
| <i>Fossil resource scarcity</i>        | kg oil eq                | 2.16E-01 | 0.00E+00  | 1.36E-01 | 3.75E-02 | 4.56E-04 | 1.11E-05 | 2.47E-02 | 1.74E-02 | 6.26E-07 | 1.49E-05 |
| <i>Water consumption</i>               | m <sup>3</sup>           | 4.21E-03 | -5.94E-06 | 2.07E-03 | 5.16E-04 | 8.87E-06 | 1.13E-06 | 4.57E-04 | 1.15E-03 | 6.17E-06 | 6.37E-07 |

**Table SI-26.** Midpoint characterization (%) of the Rostovtsev et al. procedure (ReCiPe 2016)

| <b>Impact category</b>                         | <b>Total (%)</b> | <b>Synthetic procedure</b> | <b>Phenyl acetylene</b> | <b>Benzyl azide</b> | <b>tBuOH</b> | <b>H<sub>2</sub>O</b> | <b>Cu (0)</b> | <b>Chemical factory</b> |
|------------------------------------------------|------------------|----------------------------|-------------------------|---------------------|--------------|-----------------------|---------------|-------------------------|
| <i>Global warming</i>                          | 100              | 0.4419                     | 74.7919                 | 15.7339             | 6.3798       | 0.0131                | 2.6232        | 0.0161                  |
| <i>Stratospheric ozone depletion</i>           | 100              | 0.0000                     | 98.1932                 | 0.7546              | 0.3043       | 0.0023                | 0.7442        | 0.0014                  |
| <i>Ionizing radiation</i>                      | 100              | 0.0000                     | 46.4985                 | 19.0266             | 24.6195      | 0.0492                | 9.7481        | 0.0581                  |
| <i>Ozone formation. Human health</i>           | 100              | 0.0000                     | 74.0948                 | 14.0823             | 3.7422       | 0.0078                | 8.0570        | 0.0160                  |
| <i>Fine particulate matter formation</i>       | 100              | 0.0000                     | 58.6503                 | 10.5959             | 2.8852       | 0.0189                | 27.8209       | 0.0288                  |
| <i>Ozone formation. Terrestrial ecosystems</i> | 100              | 0.0000                     | 74.2450                 | 14.8397             | 3.8157       | 0.0070                | 7.0784        | 0.0141                  |
| <i>Terrestrial acidification</i>               | 100              | 0.0000                     | 57.1886                 | 9.4324              | 2.6674       | 0.0191                | 30.6676       | 0.0249                  |
| <i>Freshwater eutrophication</i>               | 100              | 0.0000                     | 59.7595                 | 14.7642             | 6.1622       | 0.0131                | 19.2735       | 0.0275                  |
| <i>Marine eutrophication</i>                   | 100              | 0.0000                     | 31.2446                 | 55.4916             | 4.3186       | 0.0130                | 8.9191        | 0.0131                  |
| <i>Terrestrial ecotoxicity</i>                 | 100              | 0.0000                     | 45.7994                 | 17.9524             | 4.0509       | 0.0165                | 32.1135       | 0.0673                  |
| <i>Freshwater ecotoxicity</i>                  | 100              | 0.0000                     | 35.4778                 | 62.1570             | 0.3200       | 0.0045                | 2.0354        | 0.0052                  |
| <i>Marine ecotoxicity</i>                      | 100              | 0.0000                     | 56.6725                 | 18.2068             | 5.0626       | 0.0251                | 19.9540       | 0.0790                  |
| <i>Human carcinogenic toxicity</i>             | 100              | 0.0000                     | 46.5293                 | 6.8698              | 2.0730       | 0.0193                | 44.4435       | 0.0651                  |
| <i>Human non-carcinogenic toxicity</i>         | 100              | 0.0000                     | 28.8019                 | 4.1638              | 1.1061       | 0.0075                | 65.8846       | 0.0361                  |
| <i>Land use</i>                                | 100              | 0.0000                     | 57.0177                 | 14.7577             | 6.3221       | 0.0144                | 21.8143       | 0.0737                  |
| <i>Mineral resource scarcity</i>               | 100              | 0.0000                     | 25.1849                 | 9.8286              | 1.7939       | 0.0101                | 63.1149       | 0.0677                  |
| <i>Fossil resource scarcity</i>                | 100              | 0.0000                     | 71.8310                 | 19.8385             | 6.9418       | 0.0067                | 1.3740        | 0.0079                  |
| <i>Water consumption</i>                       | 100              | -3.2118                    | 55.2978                 | 13.7607             | 23.0698      | 3.3377                | 7.7290        | 0.0170                  |

**Table SI-27.** Midpoint characterization (units) of the Rostovtsev et al. procedure (ReCiPe 2016)

| <b>Impact category</b>                         | <b>Unit</b>           | <b>Total</b> | <b>Synthetic procedure</b> | <b>Phenyl acetylene</b> | <b>Benzyl azide</b> | <b>tBuOH</b> | <b>H<sub>2</sub>O</b> | <b>Cu (0)</b> | <b>Chemical factory</b> |
|------------------------------------------------|-----------------------|--------------|----------------------------|-------------------------|---------------------|--------------|-----------------------|---------------|-------------------------|
| <i>Global warming</i>                          | kg CO <sub>2</sub> eq | 3.90E-01     | 1.72E-03                   | 2.92E-01                | 6.14E-02            | 2.49E-02     | 5.10E-05              | 1.02E-02      | 6.30E-05                |
| <i>Stratospheric ozone depletion</i>           | kg CFC11 eq           | 1.65E-06     | 0.00E+00                   | 1.62E-06                | 1.24E-08            | 5.01E-09     | 3.82E-11              | 1.23E-08      | 2.33E-11                |
| <i>Ionizing radiation</i>                      | kBq Co-60 eq          | 7.96E-04     | 0.00E+00                   | 3.70E-04                | 1.51E-04            | 1.96E-04     | 3.92E-07              | 7.76E-05      | 4.63E-07                |
| <i>Ozone formation. Human health</i>           | kg NOx eq             | 1.22E-03     | 0.00E+00                   | 9.05E-04                | 1.72E-04            | 4.57E-05     | 9.57E-08              | 9.84E-05      | 1.95E-07                |
| <i>Fine particulate matter formation</i>       | kg PM2.5 eq           | 7.06E-04     | 0.00E+00                   | 4.14E-04                | 7.48E-05            | 2.04E-05     | 1.34E-07              | 1.96E-04      | 2.03E-07                |
| <i>Ozone formation. Terrestrial ecosystems</i> | kg NOx eq             | 1.42E-03     | 0.00E+00                   | 1.05E-03                | 2.11E-04            | 5.42E-05     | 9.98E-08              | 1.00E-04      | 2.01E-07                |
| <i>Terrestrial acidification</i>               | kg SO <sub>2</sub> eq | 1.99E-03     | 0.00E+00                   | 1.14E-03                | 1.88E-04            | 5.31E-05     | 3.80E-07              | 6.10E-04      | 4.95E-07                |
| <i>Freshwater eutrophication</i>               | kg P eq               | 1.91E-05     | 0.00E+00                   | 1.14E-05                | 2.82E-06            | 1.18E-06     | 2.50E-09              | 3.69E-06      | 5.27E-09                |
| <i>Marine eutrophication</i>                   | kg N eq               | 5.18E-06     | 0.00E+00                   | 1.62E-06                | 2.88E-06            | 2.24E-07     | 6.74E-10              | 4.62E-07      | 6.81E-10                |

|                                        |                          |          |           |          |          |          |          |          |          |
|----------------------------------------|--------------------------|----------|-----------|----------|----------|----------|----------|----------|----------|
| <i>Terrestrial ecotoxicity</i>         | kg 1,4-DCB               | 4.18E+00 | 0.00E+00  | 1.91E+00 | 7.50E-01 | 1.69E-01 | 6.90E-04 | 1.34E+00 | 2.81E-03 |
| <i>Freshwater ecotoxicity</i>          | kg 1,4-DCB               | 4.49E-03 | 0.00E+00  | 1.59E-03 | 2.79E-03 | 1.44E-05 | 2.03E-07 | 9.14E-05 | 2.33E-07 |
| <i>Marine ecotoxicity</i>              | kg 1,4-DCB               | 3.89E-03 | 0.00E+00  | 2.21E-03 | 7.09E-04 | 1.97E-04 | 9.78E-07 | 7.77E-04 | 3.08E-06 |
| <i>Human carcinogenic toxicity</i>     | kg 1,4-DCB               | 3.61E-03 | 0.00E+00  | 1.68E-03 | 2.48E-04 | 7.48E-05 | 6.97E-07 | 1.60E-03 | 2.35E-06 |
| <i>Human non-carcinogenic toxicity</i> | kg 1,4-DCB               | 3.27E-01 | 0.00E+00  | 9.41E-02 | 1.36E-02 | 3.61E-03 | 2.45E-05 | 2.15E-01 | 1.18E-04 |
| <i>Land use</i>                        | m <sup>2</sup> a crop eq | 1.05E-02 | 0.00E+00  | 5.98E-03 | 1.55E-03 | 6.63E-04 | 1.51E-06 | 2.29E-03 | 7.73E-06 |
| <i>Mineral resource scarcity</i>       | kg Cu eq                 | 3.88E-03 | 0.00E+00  | 9.77E-04 | 3.81E-04 | 6.96E-05 | 3.91E-07 | 2.45E-03 | 2.63E-06 |
| <i>Fossil resource scarcity</i>        | kg oil eq                | 1.89E-01 | 0.00E+00  | 1.36E-01 | 3.75E-02 | 1.31E-02 | 1.27E-05 | 2.59E-03 | 1.49E-05 |
| <i>Water consumption</i>               | m <sup>3</sup>           | 3.75E-03 | -1.20E-04 | 2.07E-03 | 5.16E-04 | 8.65E-04 | 1.25E-04 | 2.90E-04 | 6.37E-07 |

**Table SI-28.** Midpoint characterization (%) of the Himo et al. procedure (ReCiPe 2016)

| Impact category                                | Total (%) | Synthetic procedure | Phenyl acetylene | Benzyl azide | Sodium ascorbate | Copper sulfate | tBuOH   | H <sub>2</sub> O | Chemical factory |
|------------------------------------------------|-----------|---------------------|------------------|--------------|------------------|----------------|---------|------------------|------------------|
| <i>Global warming</i>                          | 100       | 0.4567              | 76.3182          | 16.0550      | 0.6146           | 0.0114         | 6.5100  | 0.0175           | 0.0165           |
| <i>Stratospheric ozone depletion</i>           | 100       | 0.0000              | 98.8662          | 0.7597       | 0.0606           | 0.0026         | 0.3064  | 0.0031           | 0.0014           |
| <i>Ionizing radiation</i>                      | 100       | 0.0000              | 50.9257          | 20.8382      | 1.0942           | 0.0438         | 26.9636 | 0.0708           | 0.0636           |
| <i>Ozone formation. Human health</i>           | 100       | 0.0000              | 80.2287          | 15.2481      | 0.4124           | 0.0303         | 4.0520  | 0.0111           | 0.0173           |
| <i>Fine particulate matter formation</i>       | 100       | 0.0000              | 80.7825          | 14.5943      | 0.4479           | 0.1275         | 3.9739  | 0.0342           | 0.0397           |
| <i>Ozone formation. Terrestrial ecosystems</i> | 100       | 0.0000              | 79.5395          | 15.8980      | 0.4232           | 0.0264         | 4.0879  | 0.0099           | 0.0152           |
| <i>Terrestrial acidification</i>               | 100       | 0.0000              | 81.9749          | 13.5205      | 0.4639           | 0.1457         | 3.8235  | 0.0359           | 0.0356           |
| <i>Freshwater eutrophication</i>               | 100       | 0.0000              | 73.3758          | 18.1283      | 0.7976           | 0.0772         | 7.5662  | 0.0211           | 0.0338           |
| <i>Marine eutrophication</i>                   | 100       | 0.0000              | 33.5590          | 59.6022      | 2.1365           | 0.0313         | 4.6385  | 0.0183           | 0.0141           |
| <i>Terrestrial ecotoxicity</i>                 | 100       | 0.0000              | 66.8600          | 26.2077      | 0.7209           | 0.1678         | 5.9136  | 0.0317           | 0.0982           |
| <i>Freshwater ecotoxicity</i>                  | 100       | 0.0000              | 36.1568          | 63.3465      | 0.0619           | 0.0973         | 0.3262  | 0.0060           | 0.0053           |
| <i>Marine ecotoxicity</i>                      | 100       | 0.0000              | 70.0847          | 22.5157      | 0.7528           | 0.2476         | 6.2607  | 0.0408           | 0.0977           |
| <i>Human carcinogenic toxicity</i>             | 100       | 0.0000              | 83.1931          | 12.2830      | 0.3876           | 0.2681         | 3.7065  | 0.0454           | 0.1164           |
| <i>Human non-carcinogenic toxicity</i>         | 100       | 0.0000              | 83.5959          | 12.0852      | 0.3610           | 0.6140         | 3.2104  | 0.0286           | 0.1049           |
| <i>Land use</i>                                | 100       | 0.0000              | 71.3096          | 18.4568      | 2.1193           | 0.0915         | 7.9068  | 0.0237           | 0.0922           |
| <i>Mineral resource scarcity</i>               | 100       | 0.0000              | 67.4895          | 26.3383      | 0.6003           | 0.5478         | 4.8071  | 0.0355           | 0.1814           |
| <i>Fossil resource scarcity</i>                | 100       | 0.0000              | 72.3800          | 19.9901      | 0.6123           | 0.0059         | 6.9949  | 0.0089           | 0.0079           |
| <i>Water consumption</i>                       | 100       | -4.5382             | 59.5014          | 14.8067      | 0.6400           | 0.0323         | 24.8235 | 4.7160           | 0.0183           |

**Table SI-29.** Midpoint characterization (units) of the Himo et al. procedure (ReCiPe 2016)

| Impact category                                | Unit                  | Total    | Synthetic procedure | Phenyl acetylene | Benzyl azide | Sodium ascorbate | Copper sulfate | tBuOH    | H <sub>2</sub> O | Chemical factory |
|------------------------------------------------|-----------------------|----------|---------------------|------------------|--------------|------------------|----------------|----------|------------------|------------------|
| <i>Global warming</i>                          | kg CO <sub>2</sub> eq | 3.82E-01 | 1.75E-03            | 2.92E-01         | 6.14E-02     | 2.35E-03         | 4.37E-05       | 2.49E-02 | 6.70E-05         | 6.30E-05         |
| <i>Stratospheric ozone depletion</i>           | kg CFC11 eq           | 1.63E-06 | 0.00E+00            | 1.62E-06         | 1.24E-08     | 9.91E-10         | 4.18E-11       | 5.01E-09 | 5.01E-11         | 2.33E-11         |
| <i>Ionizing radiation</i>                      | kBq Co-60 eq          | 7.27E-04 | 0.00E+00            | 3.70E-04         | 1.51E-04     | 7.96E-06         | 3.19E-07       | 1.96E-04 | 5.15E-07         | 4.63E-07         |
| <i>Ozone formation. Human health</i>           | kg NOx eq             | 1.13E-03 | 0.00E+00            | 9.05E-04         | 1.72E-04     | 4.65E-06         | 3.42E-07       | 4.57E-05 | 1.26E-07         | 1.95E-07         |
| <i>Fine particulate matter formation</i>       | kg PM2.5 eq           | 5.13E-04 | 0.00E+00            | 4.14E-04         | 7.48E-05     | 2.30E-06         | 6.53E-07       | 2.04E-05 | 1.76E-07         | 2.03E-07         |
| <i>Ozone formation. Terrestrial ecosystems</i> | kg NOx eq             | 1.33E-03 | 0.00E+00            | 1.05E-03         | 2.11E-04     | 5.61E-06         | 3.49E-07       | 5.42E-05 | 1.31E-07         | 2.01E-07         |

|                                        |                          |          |           |          |          |          |          |          |          |          |
|----------------------------------------|--------------------------|----------|-----------|----------|----------|----------|----------|----------|----------|----------|
| <i>Terrestrial acidification</i>       | kg SO <sub>2</sub> eq    | 1.39E-03 | 0.00E+00  | 1.14E-03 | 1.88E-04 | 6.44E-06 | 2.02E-06 | 5.31E-05 | 4.98E-07 | 4.95E-07 |
| <i>Freshwater eutrophication</i>       | kg P eq                  | 1.56E-05 | 0.00E+00  | 1.14E-05 | 2.82E-06 | 1.24E-07 | 1.20E-08 | 1.18E-06 | 3.28E-09 | 5.27E-09 |
| <i>Marine eutrophication</i>           | kg N eq                  | 4.83E-06 | 0.00E+00  | 1.62E-06 | 2.88E-06 | 1.03E-07 | 1.51E-09 | 2.24E-07 | 8.85E-10 | 6.81E-10 |
| <i>Terrestrial ecotoxicity</i>         | kg 1,4-DCB               | 2.86E+00 | 0.00E+00  | 1.91E+00 | 7.50E-01 | 2.06E-02 | 4.80E-03 | 1.69E-01 | 9.06E-04 | 2.81E-03 |
| <i>Freshwater ecotoxicity</i>          | kg 1,4-DCB               | 4.40E-03 | 0.00E+00  | 1.59E-03 | 2.79E-03 | 2.72E-06 | 4.28E-06 | 1.44E-05 | 2.66E-07 | 2.33E-07 |
| <i>Marine ecotoxicity</i>              | kg 1,4-DCB               | 3.15E-03 | 0.00E+00  | 2.21E-03 | 7.09E-04 | 2.37E-05 | 7.80E-06 | 1.97E-04 | 1.28E-06 | 3.08E-06 |
| <i>Human carcinogenic toxicity</i>     | kg 1,4-DCB               | 2.02E-03 | 0.00E+00  | 1.68E-03 | 2.48E-04 | 7.82E-06 | 5.41E-06 | 7.48E-05 | 9.15E-07 | 2.35E-06 |
| <i>Human non-carcinogenic toxicity</i> | kg 1,4-DCB               | 1.13E-01 | 0.00E+00  | 9.41E-02 | 1.36E-02 | 4.06E-04 | 6.91E-04 | 3.61E-03 | 3.21E-05 | 1.18E-04 |
| <i>Land use</i>                        | m <sup>2</sup> a crop eq | 8.38E-03 | 0.00E+00  | 5.98E-03 | 1.55E-03 | 1.78E-04 | 7.67E-06 | 6.63E-04 | 1.98E-06 | 7.73E-06 |
| <i>Mineral resource scarcity</i>       | kg Cu eq                 | 1.45E-03 | 0.00E+00  | 9.77E-04 | 3.81E-04 | 8.69E-06 | 7.93E-06 | 6.96E-05 | 5.14E-07 | 2.63E-06 |
| <i>Fossil resource scarcity</i>        | kg oil eq                | 1.87E-01 | 0.00E+00  | 1.36E-01 | 3.75E-02 | 1.15E-03 | 1.11E-05 | 1.31E-02 | 1.67E-05 | 1.49E-05 |
| <i>Water consumption</i>               | m <sup>3</sup>           | 3.49E-03 | -1.58E-04 | 2.07E-03 | 5.16E-04 | 2.23E-05 | 1.13E-06 | 8.65E-04 | 1.64E-04 | 6.37E-07 |

**Table SI-30.** Midpoint characterization (%) of the Lal et al. procedure (ReCiPe 2016)

| Impact category                                | Total (%) | Synthetic procedure | Phenyl acetylene | Benzyl azide | CuBr(PPh <sub>3</sub> ) <sub>3</sub> | Ethyl acetate | Chemical factory |
|------------------------------------------------|-----------|---------------------|------------------|--------------|--------------------------------------|---------------|------------------|
| <i>Global warming</i>                          | 100       | 0.9211              | 67.9685          | 14.2985      | 0.7564                               | 16.0407       | 0.0147           |
| <i>Stratospheric ozone depletion</i>           | 100       | 0.0000              | 98.2908          | 0.7553       | 0.0297                               | 0.9228        | 0.0014           |
| <i>Ionizing radiation</i>                      | 100       | 0.0000              | 49.5877          | 20.2906      | 0.9384                               | 29.1213       | 0.0620           |
| <i>Ozone formation. Human health</i>           | 100       | 0.1777              | 72.9117          | 13.8574      | 0.4333                               | 12.6042       | 0.0157           |
| <i>Fine particulate matter formation</i>       | 100       | 0.0000              | 71.0328          | 12.8329      | 0.6430                               | 15.4563       | 0.0349           |
| <i>Ozone formation. Terrestrial ecosystems</i> | 100       | 0.2454              | 72.8217          | 14.5552      | 0.4146                               | 11.9492       | 0.0139           |
| <i>Terrestrial acidification</i>               | 100       | 0.0000              | 73.8478          | 12.1801      | 0.7569                               | 13.1831       | 0.0321           |
| <i>Freshwater eutrophication</i>               | 100       | 0.0000              | 52.5766          | 12.9896      | 1.4496                               | 32.9599       | 0.0242           |
| <i>Marine eutrophication</i>                   | 100       | 0.0000              | 24.3920          | 43.3212      | 26.6033                              | 5.6731        | 0.0103           |
| <i>Terrestrial ecotoxicity</i>                 | 100       | 0.0203              | 59.8876          | 23.4747      | 1.4429                               | 15.0865       | 0.0880           |
| <i>Freshwater ecotoxicity</i>                  | 100       | 0.5679              | 35.2940          | 61.8349      | 0.2483                               | 2.0497        | 0.0052           |
| <i>Marine ecotoxicity</i>                      | 100       | 0.1192              | 62.5577          | 20.0975      | 1.4065                               | 15.7319       | 0.0872           |
| <i>Human carcinogenic toxicity</i>             | 100       | 0.0000              | 77.6843          | 11.4696      | 0.6805                               | 10.0569       | 0.1087           |
| <i>Human non-carcinogenic toxicity</i>         | 100       | 0.0202              | 74.3714          | 10.7517      | 0.7229                               | 14.0406       | 0.0933           |
| <i>Land use</i>                                | 100       | 0.0000              | 63.6354          | 16.4705      | 0.7145                               | 19.0973       | 0.0823           |
| <i>Mineral resource scarcity</i>               | 100       | 0.0000              | 62.1397          | 24.2505      | 0.9959                               | 12.4468       | 0.1670           |
| <i>Fossil resource scarcity</i>                | 100       | 0.0000              | 66.4469          | 18.3515      | 0.6644                               | 14.5300       | 0.0073           |
| <i>Water consumption</i>                       | 100       | 0.0000              | 62.6360          | 15.5868      | 0.9663                               | 20.7917       | 0.0192           |

**Table SI-31.** Midpoint characterization (units) of the Lal et al. procedure (ReCiPe 2016)

| Impact category                                | Unit                  | Total    | Synthetic procedure | Phenyl acetylene | Benzyl azide | CuBr(PPh <sub>3</sub> ) <sub>3</sub> | Ethyl acetate | Chemical factory |
|------------------------------------------------|-----------------------|----------|---------------------|------------------|--------------|--------------------------------------|---------------|------------------|
| <i>Global warming</i>                          | kg CO <sub>2</sub> eq | 4.29E-01 | 3.95E-03            | 2.92E-01         | 6.14E-02     | 3.25E-03                             | 6.89E-02      | 6.30E-05         |
| <i>Stratospheric ozone depletion</i>           | kg CFC11 eq           | 1.64E-06 | 0.00E+00            | 1.62E-06         | 1.24E-08     | 4.88E-10                             | 1.52E-08      | 2.33E-11         |
| <i>Ionizing radiation</i>                      | kBq Co-60 eq          | 7.47E-04 | 0.00E+00            | 3.70E-04         | 1.51E-04     | 7.01E-06                             | 2.17E-04      | 4.63E-07         |
| <i>Ozone formation. Human health</i>           | kg NOx eq             | 1.24E-03 | 2.20E-06            | 9.05E-04         | 1.72E-04     | 5.38E-06                             | 1.56E-04      | 1.95E-07         |
| <i>Fine particulate matter formation</i>       | kg PM2.5 eq           | 5.83E-04 | 0.00E+00            | 4.14E-04         | 7.48E-05     | 3.75E-06                             | 9.01E-05      | 2.03E-07         |
| <i>Ozone formation. Terrestrial ecosystems</i> | kg NOx eq             | 1.45E-03 | 3.55E-06            | 1.05E-03         | 2.11E-04     | 6.00E-06                             | 1.73E-04      | 2.01E-07         |
| <i>Terrestrial acidification</i>               | kg SO <sub>2</sub> eq | 1.54E-03 | 0.00E+00            | 1.14E-03         | 1.88E-04     | 1.17E-05                             | 2.03E-04      | 4.95E-07         |
| <i>Freshwater eutrophication</i>               | kg P eq               | 2.17E-05 | 0.00E+00            | 1.14E-05         | 2.82E-06     | 3.15E-07                             | 7.16E-06      | 5.27E-09         |

|                                        |                          |          |          |          |          |          |          |          |
|----------------------------------------|--------------------------|----------|----------|----------|----------|----------|----------|----------|
| <i>Marine eutrophication</i>           | kg N eq                  | 6.64E-06 | 0.00E+00 | 1.62E-06 | 2.88E-06 | 1.77E-06 | 3.77E-07 | 6.81E-10 |
| <i>Terrestrial ecotoxicity</i>         | kg 1,4-DCB               | 3.19E+00 | 6.49E-04 | 1.91E+00 | 7.50E-01 | 4.61E-02 | 4.82E-01 | 2.81E-03 |
| <i>Freshwater ecotoxicity</i>          | kg 1,4-DCB               | 4.51E-03 | 2.56E-05 | 1.59E-03 | 2.79E-03 | 1.12E-05 | 9.25E-05 | 2.33E-07 |
| <i>Marine ecotoxicity</i>              | kg 1,4-DCB               | 3.53E-03 | 4.21E-06 | 2.21E-03 | 7.09E-04 | 4.96E-05 | 5.55E-04 | 3.08E-06 |
| <i>Human carcinogenic toxicity</i>     | kg 1,4-DCB               | 2.16E-03 | 0.00E+00 | 1.68E-03 | 2.48E-04 | 1.47E-05 | 2.17E-04 | 2.35E-06 |
| <i>Human non-carcinogenic toxicity</i> | kg 1,4-DCB               | 1.26E-01 | 2.55E-05 | 9.41E-02 | 1.36E-02 | 9.14E-04 | 1.78E-02 | 1.18E-04 |
| <i>Land use</i>                        | m <sup>2</sup> a crop eq | 9.39E-03 | 0.00E+00 | 5.98E-03 | 1.55E-03 | 6.71E-05 | 1.79E-03 | 7.73E-06 |
| <i>Mineral resource scarcity</i>       | kg Cu eq                 | 1.57E-03 | 0.00E+00 | 9.77E-04 | 3.81E-04 | 1.57E-05 | 1.96E-04 | 2.63E-06 |
| <i>Fossil resource scarcity</i>        | kg oil eq                | 2.04E-01 | 0.00E+00 | 1.36E-01 | 3.75E-02 | 1.36E-03 | 2.97E-02 | 1.49E-05 |
| <i>Water consumption</i>               | m <sup>3</sup>           | 3.31E-03 | 0.00E+00 | 2.07E-03 | 5.16E-04 | 3.20E-05 | 6.89E-04 | 6.37E-07 |

**Table SI-32.** Midpoint characterization (%) of the Luciani et al. procedure (ReCiPe 2016)

| <b>Impact category</b>                         | <b>Total (%)</b> | <b>Synthetic procedure</b> | <b>Phenyl acetylene</b> | <b>Benzyl azide</b> | <b>Sodium ascorbate</b> | <b>Copper sulfate</b> | <b>Poalrclean®</b> | <b>H<sub>2</sub>O</b> | <b>Chemical factory</b> |
|------------------------------------------------|------------------|----------------------------|-------------------------|---------------------|-------------------------|-----------------------|--------------------|-----------------------|-------------------------|
| <i>Global warming</i>                          | 100              | 0.1079                     | 80.4914                 | 16.9329             | 0.6630                  | 0.0048                | 1.7821             | 0.0006                | 0.0174                  |
| <i>Stratospheric ozone depletion</i>           | 100              | 0.0000                     | 99.0998                 | 0.7615              | 0.0622                  | 0.0010                | 0.0740             | 0.0001                | 0.0014                  |
| <i>Ionizing radiation</i>                      | 100              | 0.0000                     | 66.6234                 | 27.2614             | 1.4640                  | 0.0229                | 4.5422             | 0.0028                | 0.0832                  |
| <i>Ozone formation. Human health</i>           | 100              | 0.0000                     | 82.7074                 | 15.7192             | 0.4348                  | 0.0125                | 1.1079             | 0.0004                | 0.0179                  |
| <i>Fine particulate matter formation</i>       | 100              | 0.0000                     | 82.7460                 | 14.9491             | 0.4692                  | 0.0522                | 1.7418             | 0.0011                | 0.0406                  |
| <i>Ozone formation. Terrestrial ecosystems</i> | 100              | 0.0000                     | 82.0648                 | 16.4027             | 0.4466                  | 0.0109                | 1.0591             | 0.0003                | 0.0156                  |
| <i>Terrestrial acidification</i>               | 100              | 0.0000                     | 83.8171                 | 13.8244             | 0.4851                  | 0.0596                | 1.7763             | 0.0011                | 0.0364                  |
| <i>Freshwater eutrophication</i>               | 100              | 0.0000                     | 77.3394                 | 19.1075             | 0.8598                  | 0.0325                | 2.6244             | 0.0007                | 0.0356                  |
| <i>Marine eutrophication</i>                   | 100              | 0.0000                     | 32.5795                 | 57.8624             | 2.1213                  | 0.0122                | 7.4104             | 0.0005                | 0.0137                  |
| <i>Terrestrial ecotoxicity</i>                 | 100              | 0.0000                     | 70.6691                 | 27.7008             | 0.7793                  | 0.0709                | 0.6750             | 0.0010                | 0.1038                  |
| <i>Freshwater ecotoxicity</i>                  | 100              | 0.0000                     | 36.1125                 | 63.2688             | 0.0632                  | 0.0389                | 0.5112             | 0.0002                | 0.0053                  |
| <i>Marine ecotoxicity</i>                      | 100              | 0.0000                     | 74.0317                 | 23.7837             | 0.8133                  | 0.1046                | 1.1622             | 0.0013                | 0.1032                  |
| <i>Human carcinogenic toxicity</i>             | 100              | 0.0000                     | 85.5022                 | 12.6239             | 0.4074                  | 0.1102                | 1.2353             | 0.0014                | 0.1196                  |
| <i>Human non-carcinogenic toxicity</i>         | 100              | 0.0000                     | 85.8746                 | 12.4146             | 0.3793                  | 0.2523                | 0.9706             | 0.0009                | 0.1078                  |
| <i>Land use</i>                                | 100              | 0.0000                     | 76.2087                 | 19.7249             | 2.3164                  | 0.0391                | 1.6116             | 0.0008                | 0.0986                  |
| <i>Mineral resource scarcity</i>               | 100              | 0.0000                     | 70.0958                 | 27.3554             | 0.6377                  | 0.2276                | 1.4940             | 0.0011                | 0.1884                  |
| <i>Fossil resource scarcity</i>                | 100              | 0.0000                     | 76.4393                 | 21.1112             | 0.6613                  | 0.0025                | 1.7770             | 0.0003                | 0.0084                  |
| <i>Water consumption</i>                       | 100              | -0.1808                    | 77.7824                 | 19.3559             | 0.8557                  | 0.0169                | 1.9582             | 0.1879                | 0.0239                  |

**Table SI-33.** Midpoint characterization (units) of the Luciani et al. procedure (ReCiPe 2016)

| <b>Impact category</b>               | <b>Unit</b>           | <b>Total</b> | <b>Synthetic procedure</b> | <b>Phenyl acetylene</b> | <b>Benzyl azide</b> | <b>Sodium ascorbate</b> | <b>Copper sulfate</b> | <b>Poalrclean®</b> | <b>H<sub>2</sub>O</b> | <b>Chemical factory</b> |
|--------------------------------------|-----------------------|--------------|----------------------------|-------------------------|---------------------|-------------------------|-----------------------|--------------------|-----------------------|-------------------------|
| <i>Global warming</i>                | kg CO <sub>2</sub> eq | 3.62E-01     | 3.91E-04                   | 2.92E-01                | 6.14E-02            | 2.40E-03                | 1.75E-05              | 6.46E-03           | 2.04E-06              | 6.30E-05                |
| <i>Stratospheric ozone depletion</i> | kg CFC11 eq           | 1.63E-06     | 0.00E+00                   | 1.62E-06                | 1.24E-08            | 1.01E-09                | 1.67E-11              | 1.21E-09           | 1.53E-12              | 2.33E-11                |

|                                                |                          |          |           |          |          |          |          |          |          |          |
|------------------------------------------------|--------------------------|----------|-----------|----------|----------|----------|----------|----------|----------|----------|
| <i>Ionizing radiation</i>                      | kBq Co-60 eq             | 5.56E-04 | 0.00E+00  | 3.70E-04 | 1.51E-04 | 8.14E-06 | 1.28E-07 | 2.52E-05 | 1.57E-08 | 4.63E-07 |
| <i>Ozone formation. Human health</i>           | kg NOx eq                | 1.09E-03 | 0.00E+00  | 9.05E-04 | 1.72E-04 | 4.76E-06 | 1.37E-07 | 1.21E-05 | 3.83E-09 | 1.95E-07 |
| <i>Fine particulate matter formation</i>       | kg PM2.5 eq              | 5.00E-04 | 0.00E+00  | 4.14E-04 | 7.48E-05 | 2.35E-06 | 2.61E-07 | 8.72E-06 | 5.35E-09 | 2.03E-07 |
| <i>Ozone formation. Terrestrial ecosystems</i> | kg NOx eq                | 1.28E-03 | 0.00E+00  | 1.05E-03 | 2.11E-04 | 5.74E-06 | 1.40E-07 | 1.36E-05 | 4.00E-09 | 2.01E-07 |
| <i>Terrestrial acidification</i>               | kg SO <sub>2</sub> eq    | 1.36E-03 | 0.00E+00  | 1.14E-03 | 1.88E-04 | 6.59E-06 | 8.09E-07 | 2.41E-05 | 1.52E-08 | 4.95E-07 |
| <i>Freshwater eutrophication</i>               | kg P eq                  | 1.48E-05 | 0.00E+00  | 1.14E-05 | 2.82E-06 | 1.27E-07 | 4.81E-09 | 3.88E-07 | 1.00E-10 | 5.27E-09 |
| <i>Marine eutrophication</i>                   | kg N eq                  | 4.97E-06 | 0.00E+00  | 1.62E-06 | 2.88E-06 | 1.05E-07 | 6.05E-10 | 3.68E-07 | 2.70E-11 | 6.81E-10 |
| <i>Terrestrial ecotoxicity</i>                 | kg 1,4-DCB               | 2.71E+00 | 0.00E+00  | 1.91E+00 | 7.50E-01 | 2.11E-02 | 1.92E-03 | 1.83E-02 | 2.76E-05 | 2.81E-03 |
| <i>Freshwater ecotoxicity</i>                  | kg 1,4-DCB               | 4.41E-03 | 0.00E+00  | 1.59E-03 | 2.79E-03 | 2.79E-06 | 1.71E-06 | 2.25E-05 | 8.11E-09 | 2.33E-07 |
| <i>Marine ecotoxicity</i>                      | kg 1,4-DCB               | 2.98E-03 | 0.00E+00  | 2.21E-03 | 7.09E-04 | 2.42E-05 | 3.12E-06 | 3.47E-05 | 3.92E-08 | 3.08E-06 |
| <i>Human carcinogenic toxicity</i>             | kg 1,4-DCB               | 1.96E-03 | 0.00E+00  | 1.68E-03 | 2.48E-04 | 8.00E-06 | 2.16E-06 | 2.43E-05 | 2.79E-08 | 2.35E-06 |
| <i>Human non-carcinogenic toxicity</i>         | kg 1,4-DCB               | 1.10E-01 | 0.00E+00  | 9.41E-02 | 1.36E-02 | 4.15E-04 | 2.76E-04 | 1.06E-03 | 9.80E-07 | 1.18E-04 |
| <i>Land use</i>                                | m <sup>2</sup> a crop eq | 7.84E-03 | 0.00E+00  | 5.98E-03 | 1.55E-03 | 1.82E-04 | 3.07E-06 | 1.26E-04 | 6.05E-08 | 7.73E-06 |
| <i>Mineral resource scarcity</i>               | kg Cu eq                 | 1.39E-03 | 0.00E+00  | 9.77E-04 | 3.81E-04 | 8.89E-06 | 3.17E-06 | 2.08E-05 | 1.57E-08 | 2.63E-06 |
| <i>Fossil resource scarcity</i>                | kg oil eq                | 1.77E-01 | 0.00E+00  | 1.36E-01 | 3.75E-02 | 1.17E-03 | 4.44E-06 | 3.15E-03 | 5.08E-07 | 1.49E-05 |
| <i>Water consumption</i>                       | m <sup>3</sup>           | 2.67E-03 | -4.82E-06 | 2.07E-03 | 5.16E-04 | 2.28E-05 | 4.51E-07 | 5.22E-05 | 5.01E-06 | 6.37E-07 |

**Table SI-34.** Endpoint-single score comparison for the three damage areas considered among the procedures analyzed (ReCiPe 2016)

| <b>Damage area</b> | <b>Unit</b> | <b>Chan et al.</b> | <b>Rostovtsev et al.</b> | <b>Himo et al.</b> | <b>Lal et al.</b> | <b>Luciani et al.</b> |
|--------------------|-------------|--------------------|--------------------------|--------------------|-------------------|-----------------------|
| Human health       | mPts        | 15.9984            | 15.0330                  | 11.9772            | 13.4971           | 11.5001               |
| Ecosystems         | mPts        | 0.6258             | 0.5139                   | 0.4597             | 0.5122            | 0.4368                |
| Resources          | mPts        | 0.6091             | 0.5396                   | 0.5343             | 0.5682            | 0.5065                |
| <b>Total</b>       | mPts        | 17.2333            | 16.0864                  | 12.9711            | 14.5775           | 12.4434               |

**Table SI-35.** Endpoint unit values of the procedures considered (ReCiPe 2016)

| <b>Procedure</b>  | <b>DALY</b> | <b>Species.yr</b> | <b>USD2013</b> |
|-------------------|-------------|-------------------|----------------|
| Chan et al.       | 9.59E-7     | 2.31E-9           | 0.0853         |
| Rostovtsev et al. | 9.0E-7      | 1.9E-9            | 0.0756         |
| Himo et al.       | 7.18E-7     | 1.7E-9            | 0.0748         |
| Lal et al.        | 8.09E-7     | 1.89E-9           | 0.0796         |
| Luciani et al.    | 6.89E-7     | 1.62E-9           | 0.0709         |

**Table SI-36.** Influence of the impact categories in the Endpoint-single score comparison among the procedures analyzed (ReCiPe 2016)

| Impact category                                 | Unit | Chan et al. | Rostovtsev et al. | Himo et al. | Lal et al. | Luciani et al. |
|-------------------------------------------------|------|-------------|-------------------|-------------|------------|----------------|
| <i>Global warming, Human health</i>             | mPts | 7.0558      | 6.0388            | 5.9180      | 6.6449     | 5.6112         |
| <i>Global warming, Terrestrial ecosystems</i>   | mPts | 0.3453      | 0.2955            | 0.2896      | 0.3252     | 0.2746         |
| <i>Global warming, Freshwater ecosystems</i>    | mPts | 9.43E-06    | 8.07E-06          | 7.91E-06    | 8.88E-06   | 7.50E-06       |
| <i>Stratospheric ozone depletion</i>            | mPts | 0.0183      | 0.0146            | 0.0145      | 0.0146     | 0.0145         |
| <i>Ionizing radiation</i>                       | mPts | 0.0001      | 0.0001            | 0.0001      | 0.0001     | 0.0001         |
| <i>Ozone formation, Human health</i>            | mPts | 0.0200      | 0.0185            | 0.0171      | 0.0188     | 0.0166         |
| <i>Fine particulate matter formation</i>        | mPts | 8.1451      | 7.3974            | 5.3715      | 6.1090     | 5.2440         |
| <i>Ozone formation, Terrestrial ecosystems</i>  | mPts | 0.0535      | 0.0495            | 0.0462      | 0.0505     | 0.0448         |
| <i>Terrestrial acidification</i>                | mPts | 0.1758      | 0.1141            | 0.0796      | 0.0884     | 0.0779         |
| <i>Freshwater eutrophication</i>                | mPts | 0.0036      | 0.0035            | 0.0028      | 0.0039     | 0.0027         |
| <i>Marine eutrophication</i>                    | mPts | 4.18E-06    | 2.39E-06          | 2.22E-06    | 3.06E-06   | 2.29E-06       |
| <i>Terrestrial ecotoxicity</i>                  | mPts | 0.0100      | 0.0129            | 0.0088      | 0.0099     | 0.0083         |
| <i>Freshwater ecotoxicity</i>                   | mPts | 0.0009      | 0.0008            | 0.0008      | 0.0008     | 0.0008         |
| <i>Marine ecotoxicity</i>                       | mPts | 0.0001      | 0.0001            | 0.0001      | 0.0001     | 0.0001         |
| <i>Human carcinogenic toxicity</i>              | mPts | 0.1354      | 0.2000            | 0.1118      | 0.1198     | 0.1088         |
| <i>Human non-carcinogenic toxicity</i>          | mPts | 0.4829      | 1.2408            | 0.4276      | 0.4806     | 0.4163         |
| <i>Land use</i>                                 | mPts | 0.0225      | 0.0251            | 0.0201      | 0.0225     | 0.0188         |
| <i>Mineral resource scarcity</i>                | mPts | 0.0027      | 0.0064            | 0.0024      | 0.0026     | 0.0023         |
| <i>Fossil resource scarcity</i>                 | mPts | 0.6063      | 0.5332            | 0.5319      | 0.5656     | 0.5042         |
| <i>Water consumption, Human health</i>          | mPts | 0.1407      | 0.1227            | 0.1165      | 0.1093     | 0.0886         |
| <i>Water consumption, Terrestrial ecosystem</i> | mPts | 0.0140      | 0.0123            | 0.0116      | 0.0110     | 0.0089         |
| <i>Water consumption, Aquatic ecosystems</i>    | mPts | 8.49E-07    | 7.78E-07          | 7.14E-07    | 7.50E-07   | 5.95E-07       |
| <b>Total</b>                                    | mPts | 17.2333     | 16.0864           | 12.9711     | 14.5775    | 12.4434        |

## References

1. R. Chan, R. Hilgraf, K. B. Sharpless and V. V. Fokin, *Org. Lett.*, 2004, **6**, 2853–2855.
2. V. V. Rostovtsev, L. G. Green, V. V. Fokin and K. B. Sharpless, *Angew. Chemie - Int. Ed.*, 2002, **41**, 2596–2599.
3. F. Himo, T. Lovell, R. Hilgraf, V. V. Rostovtsev, L. Noodleman, K. B. Sharpless and V. V. Fokin, *J. Am. Chem. Soc.*, 2005, **127**, 210–216.
4. S. Lal and S. Díez-González, *J. Org. Chem.*, 2011, **76**, 2367–2373.
5. L. Luciani, E. Goff, D. Lanari, S. Santoro and L. Vaccaro, *Green Chem.*, 2018, **20**, 183–187.
6. F. Campana, D. Lanari, F. De Angelis and L. Vaccaro, *Green Chem.*, 2025, **27**, 11903–11913.
7. F. Campana, D. Lanari, F. De Angelis and L. Vaccaro, *EES Sol.*, 2025, **1**, 982–989.
8. [https://commission.europa.eu/strategy-and-policy/priorities-2019-2024/european-green-deal/energy-and-green-deal\\_en](https://commission.europa.eu/strategy-and-policy/priorities-2019-2024/european-green-deal/energy-and-green-deal_en) (accessed March 2026)

- 9 F. Campana, K. Zhou, J. A. Yunda, A. Nazari, D. Bonifazi, S. Melinte and L. Vaccaro, *Chem. Eng. J.*, 2025, **504**, 158822.
- 10 J. Osorio-Tejada, F. Ferlin, L. Vaccaro and V. Hessel, *Green Chem.*, 2022, **24**, 325–337.
11. G. Doka, Life Cycle Inventories of Waste Treatment Services. ecoinvent report No. 13. Swiss Centre for Life Cycle Inventories, Dübendorf, 2009.
12. M. A. J. Huijbregts, Z. J. N. Steinmann, P. M. F. Elshout, G. Stam, F. Verones, M. Vieira, M. Zijp, A. Hollander and R. van Zelm, *Int. J. Life Cycle Assess.*, 2017, **22**, 138–147.
13. S. Sarkar, S. Pal, S. Santra, G. V. Zyryanov and A. Majee, *J. Org. Chem.*, 2024, **89**, 8137–8145.
14. H. Jiang, K. Jin, X. Lin, M. Yu, X. Xiao and X. Huang. *Org. Biomol. Chem.*, 2024, **22**, 6960–6965.
15. C. Jiang, D. Liu, W. Zhang, *Method for the preparation of sodium azide*, CN Pat. 102718197 B, 2012
16. J. C. P. Mayer, P. C. Pereira, P. L. Sagrilo, B. A. Iglesias, D. F. Back, V. N. da Rocha, M. H. Köhler, O. E. D. Rodrigues and L. Dornelles, *J. Mol. Struct.*, 2024, **1311**, 138420.
17. W. A. Holland, *Preparation of sodium ascorbate*, US Pat., 2,442,005, 1948.
18. H. Biltz and W. Biltz, *Laboratory Methods of Inorganic Chemistry*, 2nd edn., John Wiley and Sons, Hoboken, NJ, USA, 1928.
19. G. Eglinton, E. R. H. Jones, M. C. J. Whiting, *J. Chem. Soc.*, 1952, 2873-2882.
20. C. L. Mero, H. Y. Elnager and R. C. Herndon Jr., *Process for producing propargyl bromide*, US Pat., 6,794,551 B2, 2004.
21. J. W. Zwikker, L. Brandsma and H. D. Verkruijsse, *Synthesis*, 2003, 2427–2428.
22. N. Jungbluth, Life Cycle Inventory of Sodium Acetate and Expanded Graphite, ESU-services Ltd., Uster, Switzerland, 2008.
23. W. K. Chu, C. K. Rono and B. C. E. Makhubela, *Eur. J. Inorg. Chem.*, 2024, **27**, e202300541.
24. G. Brauer, *Handbook of Preparative Inorganic Chemistry*, Academic Press, 1963.
25. Y. Nakayama, K. Hirao, C. Yazawa, *Process for producing triphenylphosphine*, US Pat., 4,212,831, 1980.
26. G. Zhang, H. Gao, D. Zhu, W. Gao, D. Xiao, T. Xu, X. Li. *Preparation method of triphenylphosphine cuprous salt*. CN Pat., 114349787 B, 2023.
27. D. Lu, I. Oluk, M. Jung, S. Tseng, D. M. Byrne, T. A. L. Harris and I. C. Escobar, *Polymers*, 2025, **17**, 1–22.
